# Supplementary material for: Making a Virtue of Necessity: The Use of Wild Edible Plant Species (Also Toxic) in Bread Making in Times of Famine According to Giovanni Targioni Tozzetti (1766)
Source: MDPI journal article supplement (doi:10.3390/biology11020285), 2022-02-11
Supplement: s1 [file s1]

**Table S1.** List of vernacular names used by Giovanni Targioni Tozzetti accompanied by part used (*PU*), procedure of use (*Procedure*), and toxicity (*Tox*) [6]. It is also reported: if the species is cultivated (*C*), the current name according to the most recent nomenclature for Italy [17] (*Species*), the presence in the AlimurgITA database (*DB*), the indication of toxicity according to Guarrera (*ToxG*) [20], Acta Plantarum (*ToxAP*) [18] and Plants For A Future - PFAF (*Hazard* - reported only if known and related to the part used) [21].

| Vernacular name               | PU                            | Procedure                                                                                                                                                                                  | Tox | C | Species                           | Family         | DB  | Tox G | Tox AP | Hazard                                                                                       |
|-------------------------------|-------------------------------|--------------------------------------------------------------------------------------------------------------------------------------------------------------------------------------------|-----|---|-----------------------------------|----------------|-----|-------|--------|----------------------------------------------------------------------------------------------|
| <i>Abeti</i>                  | Seeds                         | Dried seeds are ground in order to obtain flour to be mixed with bread dough                                                                                                               |     |   | <i>Abies alba</i> Miller          | Pinaceae       | Yes |       |        |                                                                                              |
|                               |                               |                                                                                                                                                                                            |     |   | <i>Picea abies</i> (L.) H. Karst. |                | Yes |       |        |                                                                                              |
| <i>Acanto o Branca Orsina</i> | Leaves and tops               | Raw leaves and tops are crushed and added to bread dough                                                                                                                                   |     |   | <i>Acanthus mollis</i> L.         | Acanthaceae    | No  |       |        |                                                                                              |
| <i>Acero</i>                  | Seeds                         | The seeds, bitter, must be boiled with a double change of water and then left three days in running water. Once dried, they are ground in order to obtain flour to be mixed to bread dough |     |   | <i>Acer platanoides</i> L.        | Sapindaceae    | No  |       |        |                                                                                              |
|                               |                               |                                                                                                                                                                                            |     |   | <i>Acer pseudoplatanus</i> L.     |                | Yes |       |        |                                                                                              |
| <i>Acero detto Loppo</i>      | Tips or tops and tender twigs | Tips, tops or tender twigs must be cooked before adding them to bread dough                                                                                                                |     |   | <i>Acer campestre</i> L.          |                | Yes |       |        |                                                                                              |
|                               |                               |                                                                                                                                                                                            |     |   | <i>Acer opalus</i> Mill.          |                | Yes |       |        |                                                                                              |
| <i>Acetosa salvatica</i>      | Leaves                        | The leaves can be used to give a pretty sour flavour to unflavoured or too sweet bread doughs; they are useful against scurvy                                                              |     |   | <i>Rumex acetosa</i> L.           | Polygonaceae   | Yes | T     |        | It contains high levels of oxalic acid, the quantity of which can be reduced by cooking.     |
| <i>Aglio</i>                  | Roots                         | The bulbs can be used to modify the bitter and sour taste of some acorns                                                                                                                   |     | C | <i>Allium sativum</i> L.          | Amaryllidaceae | No  |       |        |                                                                                              |
| <i>Agrimonia</i>              | Leaves                        | The leaves can be used to give a pretty sour flavour to unflavoured or too sweet bread doughs; they are useful against scurvy                                                              |     |   | <i>Agrimonia eupatoria</i> L.     | Rosaceae       | Yes |       |        |                                                                                              |
| <i>Albicocche</i>             | Fruits                        | Fruits, dried in segments, can be crushed and mixed to bread dough; alternatively fresh or dried segments can be cooked first and then added to bread dough                                |     | C | <i>Prunus armeniaca</i> L.        |                | No  |       |        |                                                                                              |
| <i>Alcea</i>                  | Leaves                        | Leaves are boiled, if necessary twice with water change, then pounded, sieved and added to bread dough                                                                                     |     |   | <i>Althaea cannabina</i> L.       | Malvaceae      | No  |       |        |                                                                                              |
| <i>Alchimilla</i>             | Tips or tops and tender twigs | Tips, tops or tender twigs must be cooked before adding them to bread dough                                                                                                                |     |   | <i>Alchemilla vulgaris</i> L.     | Rosaceae       | Yes |       |        |                                                                                              |
| <i>Alimo</i>                  | Leaves                        | Leaves are boiled, if necessary twice with water change, then pounded, sieved and added to bread dough                                                                                     |     |   | <i>Atriplex halimus</i> L.        | Amaranthaceae  | Yes |       |        | Leaves can concentrate harmful amounts of nitrates if the plant grows on nitrogen-rich soils |

|                                                                |                                                          |                                                                                                                                                                                                                                                                                                                                                                                                                                 |   |   |                                                                    |                 |     |   |   |                                                                                                                                                                                    |
|----------------------------------------------------------------|----------------------------------------------------------|---------------------------------------------------------------------------------------------------------------------------------------------------------------------------------------------------------------------------------------------------------------------------------------------------------------------------------------------------------------------------------------------------------------------------------|---|---|--------------------------------------------------------------------|-----------------|-----|---|---|------------------------------------------------------------------------------------------------------------------------------------------------------------------------------------|
| <b>Alloro</b><br><b>Coccole di Aloro</b>                       | Fruits<br>Leaves                                         | The dried fruits are broken to extract the seed, which is boiled with ash or barrel lump and then proceeded as for <i>Lupinus albus</i><br>The leaves can be used to modify the bitter and sour taste of some acorns                                                                                                                                                                                                            |   |   | <i>Laurus nobilis</i> L.                                           | Lauraceae       | Yes |   |   |                                                                                                                                                                                    |
| <b>Alsine detta Centonchio</b>                                 | Leaves and tops                                          | Raw leaves and tops are crushed and added to bread dough                                                                                                                                                                                                                                                                                                                                                                        |   |   | <i>Stellaria media</i> (L.) Vill. subsp. <i>media</i>              | Caryophyllaceae | Yes |   | T | The leaves contain saponins, which are very poorly absorbed by the body and are also broken down by thorough cooking.                                                              |
| <b>Altea</b>                                                   | Leaves                                                   | Leaves are boiled, if necessary twice with water change, then pounded, sieved and added to bread dough                                                                                                                                                                                                                                                                                                                          |   |   | <i>Althaea officinalis</i> L.                                      | Malvaceae       | Yes |   |   |                                                                                                                                                                                    |
| <b>Amaranti</b>                                                | Leaves                                                   | Leaves are boiled, if necessary twice with water change, then pounded, sieved and added to bread dough                                                                                                                                                                                                                                                                                                                          |   |   | <i>Amaranthus hybridus</i> subsp. <i>cruentus</i> (L.) Thell.      | Amaranthaceae   | Yes |   |   | Leaves can concentrate harmful amounts of nitrates if the plant grows on nitrogen-rich soils                                                                                       |
| <b>Ambrostoli, Uve salvatiche, uva Rampina, Vite salvatica</b> | Fruits<br>Tender shoots and vines<br>Flowers<br>Tendrils | Small fruits, dried, can be added directly to bread dough<br>Cooked tender shoots and vines can be added to bread, but it would be better to eat them alone<br>Dried and pulverized flowers can be added to bread dough to improve the flavour of bland, cloying or flatulent mixtures<br>The young tendrils can be used to give a pretty sour flavour to unflavoured or too sweet bread doughs; they are useful against scurvy |   | C | <i>Vitis labrusca</i> L.                                           | Vitaceae        | No  |   |   |                                                                                                                                                                                    |
| <b>Anacio</b>                                                  | Seeds                                                    | Boil seeds with legumes, or use their decoction to knead bread that contains legume flour, to avoid mixtures that may cause flatulence                                                                                                                                                                                                                                                                                          |   |   | <i>Pimpinella anisum</i> L.                                        | Apiaceae        | No  |   |   |                                                                                                                                                                                    |
| <b>Angelica Montana</b>                                        | Leaves and Seeds                                         | Dried and pulverized leaves and seeds, can be added to bread dough to improve the flavour of bland, cloying or flatulent mixtures                                                                                                                                                                                                                                                                                               |   |   | <i>Angelica archangelica</i> L.                                    |                 | No  |   |   | All members of this genus contain furocoumarins, which increase skin sensitivity to sunlight and may cause dermatitis                                                              |
| <b>Angelica Silvestre</b>                                      | Leaves and Seeds                                         | Dried and pulverized leaves and seeds, can be added to bread dough to improve the flavour of bland, cloying or flatulent mixtures                                                                                                                                                                                                                                                                                               |   |   | <i>Angelica sylvestris</i> L.                                      |                 | Yes |   | T | All members of this genus contain furocoumarins, which increase skin sensitivity to sunlight and may cause dermatitis                                                              |
| <b>Anonide detta Bulimacola</b>                                | Young sprouts                                            | Cooked young sprouts can be added to bread, but it would be better to eat them alone                                                                                                                                                                                                                                                                                                                                            |   |   | <i>Ononis spinosa</i> subsp. <i>arvensis</i> (L.) Greuter & Burdet | Fabaceae        | Yes |   |   |                                                                                                                                                                                    |
| <b>Appio Palustre</b>                                          | Leaves and Seeds                                         | Dried and pulverized leaves and seeds, can be added to bread dough to improve the flavour of bland, cloying or flatulent mixtures                                                                                                                                                                                                                                                                                               |   | C | <i>Apium graveolens</i> L.                                         | Apiaceae        | Yes |   |   | Cross-allergenicity between celery, cucumber, carrot, watermelon and possibly apples. Avoid during pregnancy as emmenagogue, abortifacient and uterine stimulant activity reported |
| <b>Aro o Gichero</b>                                           | Roots                                                    | The procedure is described in Table 1                                                                                                                                                                                                                                                                                                                                                                                           | T |   | <i>Arum italicum</i> Mill.                                         | Araceae         | Yes | T | T |                                                                                                                                                                                    |

|                               |                               |                                                                                                                                                                                            |   |                                                                |               |     |   |   |                                                                                                                                                                                                                                                                                                                                                                                                                                                                                                                                                                                                                                                                                                                                                                           |
|-------------------------------|-------------------------------|--------------------------------------------------------------------------------------------------------------------------------------------------------------------------------------------|---|----------------------------------------------------------------|---------------|-----|---|---|---------------------------------------------------------------------------------------------------------------------------------------------------------------------------------------------------------------------------------------------------------------------------------------------------------------------------------------------------------------------------------------------------------------------------------------------------------------------------------------------------------------------------------------------------------------------------------------------------------------------------------------------------------------------------------------------------------------------------------------------------------------------------|
|                               |                               |                                                                                                                                                                                            | T | <i>Arum maculatum</i> L.                                       |               | Yes | T | T | The plant contains calcium oxylate crystals. These cause an extremely unpleasant sensation similar to needles being stuck into the mouth and tongue if they are eaten, but they are easily neutralized by thoroughly drying or cooking the plant or by steeping it in water                                                                                                                                                                                                                                                                                                                                                                                                                                                                                               |
| <i>Artemisia</i>              | Tips or tops and tender twigs | Tips, tops or tender twigs must be cooked before adding them to bread dough                                                                                                                |   | <i>Artemisia vulgaris</i> L.                                   | Asteraceae    | Yes | T |   | It might be poisonous in large doses. Probably unsafe for pregnant women as it may induce abortion                                                                                                                                                                                                                                                                                                                                                                                                                                                                                                                                                                                                                                                                        |
| <i>Asfodelo, Astula regia</i> | Roots                         | The procedure is described in Table 1                                                                                                                                                      | T | <i>Asphodeline lutea</i> (L.) Rchb.                            | Asphodelaceae | Yes |   | T |                                                                                                                                                                                                                                                                                                                                                                                                                                                                                                                                                                                                                                                                                                                                                                           |
|                               |                               |                                                                                                                                                                                            | T | <i>Asphodelus ramosus</i> L.                                   |               | Yes |   |   |                                                                                                                                                                                                                                                                                                                                                                                                                                                                                                                                                                                                                                                                                                                                                                           |
| <i>Aster detto Tripolio</i>   | Tips or tops and tender twigs | Tips, tops or tender twigs must be cooked before adding them to bread dough                                                                                                                |   | <i>Galatella tripolium</i> (L.) Galasso, Bartolucci & Ardenghi | Asteraceae    | No  |   |   |                                                                                                                                                                                                                                                                                                                                                                                                                                                                                                                                                                                                                                                                                                                                                                           |
| <i>Astragalo</i>              | Tips or tops and tender twigs | Tips, tops or tender twigs must be cooked before adding them to bread dough                                                                                                                |   | <i>Astragalus cicer</i> L.                                     | Fabaceae      | No  |   |   | Many members of this genus contain toxic glycosides. A number of species can also accumulate toxic levels of selenium when grown in soils that are relatively rich in that element                                                                                                                                                                                                                                                                                                                                                                                                                                                                                                                                                                                        |
|                               |                               |                                                                                                                                                                                            |   | <i>Astragalus exscapus</i> L.                                  |               | No  |   |   |                                                                                                                                                                                                                                                                                                                                                                                                                                                                                                                                                                                                                                                                                                                                                                           |
|                               |                               |                                                                                                                                                                                            |   | <i>Astragalus glycyphyllos</i> L.                              |               | Yes |   |   |                                                                                                                                                                                                                                                                                                                                                                                                                                                                                                                                                                                                                                                                                                                                                                           |
|                               |                               |                                                                                                                                                                                            |   | <i>Astragalus hamosus</i> L.                                   |               | Yes |   |   |                                                                                                                                                                                                                                                                                                                                                                                                                                                                                                                                                                                                                                                                                                                                                                           |
|                               |                               |                                                                                                                                                                                            |   | <i>Astragalus sesameus</i> L.                                  |               | No  |   |   |                                                                                                                                                                                                                                                                                                                                                                                                                                                                                                                                                                                                                                                                                                                                                                           |
| <i>Atriplici salvatici</i>    | Leaves                        | Leaves are boiled, if necessary twice with water change, then pounded, sieved and added to bread dough                                                                                     |   | <i>Chenopodium album</i> L.                                    | Amaranthaceae | Yes | T |   | The leaves contain saponins, which are very poorly absorbed by the body and are also broken down by thorough cooking. The plants also contain some oxalic acid, which in large quantities can lock up some of the nutrients in the food, but these plants are very nutritious vegetables in reasonable quantities. Cooking the plant will reduce its content of oxalic acid, and then only if large quantities are consumed. Leaves can concentrate harmful amounts of nitrates if the plant grows on nitrogen-rich soils. In nitrogen-rich soils, the plants can also concentrate hydrogen cyanide. In small quantities, hydrogen cyanide has been shown to stimulate respiration and improve digestion, it is also claimed to be of benefit in the treatment of cancer. |
| <i>Avornello</i>              | Seeds                         | The seeds, bitter, must be boiled with a double change of water and then left three days in running water. Once dried, they are ground in order to obtain flour to be mixed to bread dough |   | <i>Fraxinus ornus</i> L. subsp. <i>ornus</i>                   | Oleaceae      | Yes |   |   |                                                                                                                                                                                                                                                                                                                                                                                                                                                                                                                                                                                                                                                                                                                                                                           |

|                                                            |                               |                                                                                                                                                                                                                                                                                                                        |   |                                            |                 |     |  |                                                                                                                      |
|------------------------------------------------------------|-------------------------------|------------------------------------------------------------------------------------------------------------------------------------------------------------------------------------------------------------------------------------------------------------------------------------------------------------------------|---|--------------------------------------------|-----------------|-----|--|----------------------------------------------------------------------------------------------------------------------|
| <b>Bagole, cioè<br/>frutti di vite idea<br/>o Mirtillo</b> | Fruits                        | Sour fruits, fresh or dried, are cooked in water, sieved and then added to bread dough. In alternative the small fruits, dried, can be added directly to bread dough                                                                                                                                                   |   | <i>Vaccinium myrtillus</i> L.              | Ericaceae       | Yes |  | High tannin content may cause digestive disorders                                                                    |
|                                                            |                               |                                                                                                                                                                                                                                                                                                                        |   | <i>Vaccinium vitis-idea</i> L.             |                 | Yes |  | It contains the toxin “arbutin”                                                                                      |
| <b>Barbarea</b>                                            | Leaves                        | Leaves are useful against scurvy                                                                                                                                                                                                                                                                                       |   | <i>Barbarea vulgaris</i> W.T. Aiton        | Brassicaceae    | Yes |  | There is a report that ingestion of the leaves can lead to kidney malfunction                                        |
| <b>Batate</b>                                              | Roots                         | There is only one indication for a desirable, but not yet possible use                                                                                                                                                                                                                                                 | C | <i>Ipomoea batatas</i> (L.) Lam.           | Convolvulaceae  | No  |  |                                                                                                                      |
| <b>Beccabunga</b>                                          | Leaves and tops               | Raw leaves and tops are crushed and added to bread dough                                                                                                                                                                                                                                                               |   | <i>Veronica anagallis-aquatica</i> L.      | Plantaginaceae  | Yes |  |                                                                                                                      |
|                                                            |                               |                                                                                                                                                                                                                                                                                                                        |   | <i>Veronica beccabunga</i> L.              |                 | Yes |  |                                                                                                                      |
| <b>Been bianco</b>                                         | Tips or tops and tender twigs | Tips, tops or tender twigs must be cooked before adding them to bread dough                                                                                                                                                                                                                                            |   | <i>Silene vulgaris</i> (Moench) Garcke     | Caryophyllaceae | Yes |  | The plant contain saponins, which are very poorly absorbed by the body and are also broken down by thorough cooking. |
| <b>Bellide o Fior di Prato</b>                             | Leaves                        | Leaves are boiled, if necessary twice with water change, then pounded, sieved and added to bread dough                                                                                                                                                                                                                 |   | <i>Bellis perennis</i> L.                  | Asteraceae      | Yes |  |                                                                                                                      |
| <b>Berberi o Crespino</b>                                  | Fruits                        | Sour fruits, fresh or dried, are cooked in water, sieved and then added to bread dough. In alternative the small fruits, dried, can be added directly to bread dough                                                                                                                                                   |   | <i>Berberis vulgaris</i> L.                | Berberidaceae   | Yes |  |                                                                                                                      |
| <b>Bietola, Barbe Bietole</b>                              | Roots                         | Roots, dried in pieces, can be crushed and mixed to bread dough. Alternatively, fresh pieces can be cooked, sieved and then added to bread dough                                                                                                                                                                       |   | <i>Beta vulgaris</i> L.                    | Amaranthaceae   | Yes |  |                                                                                                                      |
| <b>Biodi, Biodri</b>                                       | Seeds<br>Roots                | Dried seeds are ground in order to obtain flour to be mixed with bread dough<br>Young roots, fresh or boiled, are crushed and added to bread dough                                                                                                                                                                     |   | <i>Butomus umbellatus</i> L.               | Butomaceae      | Yes |  |                                                                                                                      |
|                                                            |                               |                                                                                                                                                                                                                                                                                                                        |   | <i>Sparganium erectum</i> L.               | Typhaceae       | Yes |  |                                                                                                                      |
|                                                            |                               |                                                                                                                                                                                                                                                                                                                        |   | <i>Schoenoplectus lacustris</i> (L.) Palla | Cyperaceae      | Yes |  |                                                                                                                      |
|                                                            |                               |                                                                                                                                                                                                                                                                                                                        |   | <i>Typha latifolia</i> L.                  | Thyphaceae      | Yes |  |                                                                                                                      |
|                                                            |                               |                                                                                                                                                                                                                                                                                                                        |   | <i>Typha angustifolia</i> L.               |                 | Yes |  |                                                                                                                      |
| <b>Bislingua</b>                                           | Young sprouts                 | Cooked young sprouts can be added to bread, but it would be better to eat them alone                                                                                                                                                                                                                                   |   | <i>Ruscus hypophyllum</i> L.               | Asparagaceae    | Yes |  |                                                                                                                      |
| <b>Bistorta</b>                                            | Roots                         | The dried roots are crushed and sieved and the resulting powder is boiled, then decanted and the water is thrown away to add new water and boiled a second time, then the powder is added to the bread dough<br>Leaves are boiled, if necessary twice with water change, then pounded, sieved and added to bread dough |   | <i>Bistorta officinalis</i> Delarbre       | Polygonaceae    | Yes |  | Many species contain oxalic acid, the quantity of which can be reduced by cooking.                                   |
|                                                            | Leaves                        |                                                                                                                                                                                                                                                                                                                        |   |                                            |                 |     |  |                                                                                                                      |

|                                        |                               |                                                                                                                                                                                                                                                                             |   |                                                                                 |               |     |   |  |                                                                                                                                                                                                                              |
|----------------------------------------|-------------------------------|-----------------------------------------------------------------------------------------------------------------------------------------------------------------------------------------------------------------------------------------------------------------------------|---|---------------------------------------------------------------------------------|---------------|-----|---|--|------------------------------------------------------------------------------------------------------------------------------------------------------------------------------------------------------------------------------|
| <b>Bliti</b>                           | Leaves                        | Leaves are boiled, if necessary twice with water change, then pounded, sieved and added to bread dough                                                                                                                                                                      |   | <i>Amaranthus blitum</i> L.                                                     | Amaranthaceae | Yes |   |  | Leaves can concentrate harmful amounts of nitrates if the plant grows on nitrogen-rich soils.                                                                                                                                |
|                                        |                               |                                                                                                                                                                                                                                                                             |   | <i>Amaranthus hybridus</i> subsp. <i>caudatus</i> (L.) Iamónico & Galasso       |               | Yes |   |  |                                                                                                                                                                                                                              |
| <b>Borrana</b>                         | Leaves and tops               | Raw leaves and tops are crushed and added to bread dough                                                                                                                                                                                                                    |   | <i>Borago officinalis</i> L.                                                    | Boraginaceae  | Yes | T |  | The plant contains small amounts of pyrrolizidine alkaloids that can cause liver damage and liver cancer. These alkaloids are present in too small a quantity to be harmful unless you make borage a major part of your diet |
| <b>Brunella</b>                        | Tips or tops and tender twigs | Tips, tops or tender twigs must be cooked before adding them to bread dough                                                                                                                                                                                                 |   | <i>Prunella vulgaris</i> L.                                                     | Lamiaceae     | Yes |   |  |                                                                                                                                                                                                                              |
| <b>Buglossa</b>                        | Leaves and tops               | Raw leaves and tops are crushed and added to bread dough                                                                                                                                                                                                                    |   | <i>Anchusa azurea</i> Mill.                                                     | Boraginaceae  | Yes |   |  |                                                                                                                                                                                                                              |
|                                        |                               |                                                                                                                                                                                                                                                                             |   | <i>Anchusa officinalis</i> L.                                                   |               | Yes |   |  |                                                                                                                                                                                                                              |
| <b>Bursa Pastoris</b>                  | Leaves                        | Leaves are useful against scurvy                                                                                                                                                                                                                                            |   | <i>Capsella bursa-pastoris</i> (L.) Medik.                                      | Brassicaceae  | Yes |   |  |                                                                                                                                                                                                                              |
| <b>Calamento, Calamento montano</b>    | Leaves<br>Leaves and tops     | Boil leaves with legumes, or use their decoction to knead bread that contains legume flour, to avoid mixtures that may cause flatulence<br>Dried and pulverized leaves and tops, can be added to bread dough to improve the flavour of bland, cloying or flatulent mixtures |   | <i>Clinopodium nepeta</i> subsp. <i>spruneri</i> (Boiss.) Bartolucci & F. Conti | Lamiaceae     | No  |   |  |                                                                                                                                                                                                                              |
| <b>Calcitrapa</b>                      | Tips or tops and tender twigs | Tips, tops or tender twigs must be cooked before adding them to bread dough                                                                                                                                                                                                 |   | <i>Centaurea calcitrapa</i> L.                                                  | Asteraceae    | Yes |   |  |                                                                                                                                                                                                                              |
| <b>Calta o Calendula o Fior Rancio</b> | Tips or tops and tender twigs | Tips, tops or tender twigs must be cooked before adding them to bread dough                                                                                                                                                                                                 |   | <i>Calendula officinalis</i> L.                                                 |               | Yes |   |  | Low potential for sensitization and contact dermatitis. Possible allergies if allergic to daisy family plants.                                                                                                               |
| <b>Camenerio</b>                       | Young sprouts                 | Cooked young sprouts can be added to bread, but it would be better to eat them alone                                                                                                                                                                                        |   | <i>Chamaenerion angustifolium</i> (L.) Scop.                                    | Onagraceae    | Yes |   |  | An infusion of the leaves is said to stupefy a person                                                                                                                                                                        |
| <b>Campanule</b>                       | Leaves                        | Leaves are boiled, if necessary twice with water change, then pounded, sieved and added to bread dough                                                                                                                                                                      |   | <i>Campanula persicifolia</i> L.                                                | Campanulaceae | Yes |   |  |                                                                                                                                                                                                                              |
|                                        |                               |                                                                                                                                                                                                                                                                             |   | <i>Campanula medium</i> L.                                                      |               | Yes |   |  |                                                                                                                                                                                                                              |
| <b>Canapa</b>                          | Seeds                         | Dried seeds are ground in order to obtain flour to be mixed with bread dough as long as in small quantity                                                                                                                                                                   | C | <i>Cannabis sativa</i> L.                                                       | Cannabaceae   | No  |   |  | It is a narcotic                                                                                                                                                                                                             |
| <b>Canne</b>                           | Roots                         | The roots, fresh or boiled, are crushed and added to bread dough                                                                                                                                                                                                            |   | <i>Arundo donax</i> L.                                                          | Poaceae       | Yes |   |  |                                                                                                                                                                                                                              |
|                                        |                               |                                                                                                                                                                                                                                                                             |   | <i>Phragmites australis</i> (Cav.) Trin. ex Steud.                              |               | Yes |   |  |                                                                                                                                                                                                                              |

|                                 |                                              |                                                                                                                                                                                                                        |   |                                                                  |                                                  |     |  |  |                                                                                              |
|---------------------------------|----------------------------------------------|------------------------------------------------------------------------------------------------------------------------------------------------------------------------------------------------------------------------|---|------------------------------------------------------------------|--------------------------------------------------|-----|--|--|----------------------------------------------------------------------------------------------|
| <b>Cardi o<br/>Scardiccioni</b> | Seeds                                        | Seeds crushed and pressed in water produce an aromatic water that serves as a flavouring agent for baking flours with a sour or bitter taste                                                                           |   | <i>Carduus nutans</i> L.                                         | Asteraceae                                       | Yes |  |  |                                                                                              |
|                                 |                                              |                                                                                                                                                                                                                        |   | <i>Carduus pycnocephalus</i> L.                                  |                                                  | Yes |  |  |                                                                                              |
|                                 |                                              |                                                                                                                                                                                                                        |   | <i>Carthamus lanatus</i> L.                                      |                                                  | Yes |  |  |                                                                                              |
|                                 |                                              |                                                                                                                                                                                                                        |   | <i>Centaurea solstitialis</i> L.                                 |                                                  | Yes |  |  |                                                                                              |
|                                 |                                              |                                                                                                                                                                                                                        |   | <i>Cirsium arvense</i> (L.) Scop.                                |                                                  | Yes |  |  |                                                                                              |
|                                 |                                              |                                                                                                                                                                                                                        |   | <i>Cirsium oleraceum</i> (L.) Scop.                              |                                                  | Yes |  |  |                                                                                              |
|                                 | Roots<br>Tips or tops<br>and tender<br>twigs | The roots, boiled a first time with a small bag of ashes and a second time with pure water, are sieved and added to the bread dough<br><br>Tips, tops or tender twigs must be cooked before adding them to bread dough |   | <i>Cynara cardunculus</i> subsp. <i>scolymus</i> (L.) Hegi       | See <i>Scolimo</i>                               |     |  |  |                                                                                              |
|                                 |                                              |                                                                                                                                                                                                                        |   | <i>Dipsacus fullonum</i> L.                                      | See <i>Dissaco o Labrum Veneris o Scardaccio</i> |     |  |  |                                                                                              |
|                                 |                                              |                                                                                                                                                                                                                        |   | <i>Drypis spinosa</i> L.                                         | Caryophyllaceae                                  | No  |  |  |                                                                                              |
|                                 |                                              |                                                                                                                                                                                                                        |   | <i>Echinops sphaerocephalus</i> L. subsp. <i>sphaerocephalus</i> | Asteraceae                                       | No  |  |  |                                                                                              |
|                                 |                                              |                                                                                                                                                                                                                        |   | <i>Echinops strigosus</i> L.                                     |                                                  | No  |  |  |                                                                                              |
|                                 |                                              |                                                                                                                                                                                                                        |   | <i>Genista germanica</i> L.                                      | Fabaceae                                         | No  |  |  |                                                                                              |
|                                 |                                              |                                                                                                                                                                                                                        |   | <i>Onopordum acanthium</i> L.                                    | See <i>Onopordo o Acanzio</i>                    |     |  |  |                                                                                              |
|                                 |                                              |                                                                                                                                                                                                                        |   | <i>Ptilostemon stellatus</i> (L.) Greuter                        | Asteraceae                                       | No  |  |  |                                                                                              |
|                                 |                                              |                                                                                                                                                                                                                        |   | <i>Scolymus hispanicus</i> L.                                    |                                                  | Yes |  |  |                                                                                              |
|                                 |                                              |                                                                                                                                                                                                                        |   | <i>Scolymus maculatus</i> L.                                     |                                                  | Yes |  |  |                                                                                              |
|                                 |                                              |                                                                                                                                                                                                                        |   | <i>Silybum marianum</i> (L.) Gaertn.                             |                                                  | Yes |  |  | Leaves can concentrate harmful amounts of nitrates if the plant grows on nitrogen-rich soils |
| <b>Carici</b>                   | Seeds                                        | Dried seeds are ground in order to obtain flour to be mixed with bread dough                                                                                                                                           |   | <i>Carex acuta</i> L.                                            | Cyperaceae                                       | No  |  |  |                                                                                              |
|                                 |                                              |                                                                                                                                                                                                                        |   | <i>Carex nigra</i> (L.) Reichard                                 |                                                  | No  |  |  |                                                                                              |
| <b>Carlina</b>                  | Leaves                                       | Leaves are boiled, if necessary twice with water change, then pounded, sieved and added to bread dough                                                                                                                 |   | <i>Carlina acaulis</i> L.                                        | Asteraceae                                       | Yes |  |  |                                                                                              |
| <b>Castagne<br/>Castagno</b>    | Seeds<br>Tips or tops<br>and tender<br>twigs | Dried seeds, once peeled, are ground in order to obtain flour to be mixed with bread dough<br>Tips, tops or tender twigs must be cooked before adding them to bread dough                                              |   | <i>Castanea sativa</i> Mill.                                     | Fagaceae                                         | Yes |  |  |                                                                                              |
| <b>Ceci</b>                     | Seeds                                        | The seeds are boiled to make a mush to be mixed with the bread dough                                                                                                                                                   | C | <i>Cicer arietinum</i> L.                                        | Fabaceae                                         | No  |  |  |                                                                                              |

|                                               |                               |                                                                                                                                                               |   |   |                                                        |                                |     |   |   |                                                                                                                                     |
|-----------------------------------------------|-------------------------------|---------------------------------------------------------------------------------------------------------------------------------------------------------------|---|---|--------------------------------------------------------|--------------------------------|-----|---|---|-------------------------------------------------------------------------------------------------------------------------------------|
| <b>Cerro</b>                                  | Seeds                         | Dried seeds are ground in order to obtain flour. Before using it, acorn flour must be boiled until it becomes a liquid paste, then it is added to bread dough |   |   | <i>Quercus cerris</i> L.                               | Fagaceae                       | Yes |   |   |                                                                                                                                     |
| <b>Cetriuoli</b>                              | Fruits                        | Boiled fruit pulp is added to bread dough                                                                                                                     |   | C | <i>Cucumis sativus</i> L.                              | Cucurbitaceae                  | No  |   |   |                                                                                                                                     |
| <b>Chenopodj</b>                              | Leaves                        | Leaves are boiled, if necessary twice with water change, then pounded, sieved and added to bread dough                                                        |   |   | <i>Chenopodium album</i> L.                            | See <i>Atriplici salvatici</i> |     |   |   |                                                                                                                                     |
|                                               |                               |                                                                                                                                                               |   |   | <i>Dysphania ambrosioides</i> (L.) Mosyakin & Clemants | Amaranthaceae                  | Yes |   |   |                                                                                                                                     |
| <b>Cicerchie</b>                              | Seeds                         | The seeds are boiled to make a mush to be mixed with the bread dough                                                                                          |   |   | <i>Lathyrus sativus</i> L.                             | Fabaceae                       | Yes |   |   | The seed contains a toxic amino-acid which can cause 'lathyrism' (a disease of the nervous system) if ingested in large quantities. |
|                                               | Leaves and tops               | Raw leaves and tops are crushed and added to bread dough                                                                                                      |   |   |                                                        |                                |     |   |   |                                                                                                                                     |
| <b>Ciclamino detto Panterreno, Panporcino</b> | Roots                         | The procedure is described in table 1                                                                                                                         | T |   | <i>Cyclamen hederifolium</i> Aiton                     | Primulaceae                    | Yes | T | T | It is poisonous                                                                                                                     |
|                                               |                               |                                                                                                                                                               | T |   | <i>Cyclamen repandum</i> Sm. subsp. <i>repandum</i>    |                                | Yes | T | T |                                                                                                                                     |
| <b>Cimbalaria</b>                             | Leaves                        | Leaves are boiled, if necessary twice with water change, then pounded, sieved and added to bread dough                                                        |   |   | <i>Cymbalaria muralis</i> G.Gaertn., B.Mey. & Scherb.  | Plantaginaceae                 | Yes |   |   | It might be slightly toxic                                                                                                          |
| <b>Cippi</b>                                  | Seeds                         | Dried seeds are ground in order to obtain flour to be mixed with bread dough;                                                                                 |   |   | <i>Cyperus longus</i> L.                               | Cyperaceae                     | Yes |   |   |                                                                                                                                     |
|                                               | Roots                         |                                                                                                                                                               |   |   | <i>Cyperus rotundus</i> L.                             |                                | Yes |   |   |                                                                                                                                     |
| <b>Cirsj</b>                                  | Tips or tops and tender twigs | Tips, tops or tender twigs must be cooked before adding them to bread dough                                                                                   |   |   | <i>Cirsium vulgare</i> (Savi) Ten.                     | Asteraceae                     | Yes |   |   |                                                                                                                                     |
| <b>Citisi</b>                                 | Tips or tops and tender twigs | Tips, tops or tender twigs must be cooked before adding them to bread dough                                                                                   |   |   | <i>Medicago arborea</i> L.                             | Fabaceae                       | No  |   |   |                                                                                                                                     |
| <b>Clematide o Vitalba</b>                    | Tender shoots and vines       | Cooked tender shoots and vines can be added to bread, but it would be better to eat them alone                                                                |   |   | <i>Clematis vitalba</i> L.                             | Ranunculaceae                  | Yes | T | T | It is poisonous. The toxic principle, present in less quantity in young parts, is dissipated by heat or by drying                   |
| <b>Climeno</b>                                | Seeds                         | The seeds are boiled to make a mush to be mixed with the bread dough                                                                                          |   |   | <i>Lathyrus clymenum</i> L.                            | Fabaceae                       | Yes |   |   |                                                                                                                                     |
| <b>Cocomeri</b>                               | Tender shoots and vines       | Cooked tender shoots and vines can be added to bread, but it would be better to eat them alone                                                                |   | C | <i>Citrullus lanatus</i> (Thunb.) Matsum. & Nakai      | Cucurbitaceae                  | No  |   |   |                                                                                                                                     |
| <b>Corbezzole</b>                             | Fruits                        | Sour fruits, fresh or dried, are cooked in water, sieved and then added to bread dough                                                                        |   |   | <i>Arbutus unedo</i> L.                                | Ericaceae                      | Yes |   |   |                                                                                                                                     |
| <b>Corniole</b>                               | Fruits                        | Sour fruits, fresh or dried, are cooked in water, sieved and then added to bread dough                                                                        |   |   | <i>Cornus mas</i> L.                                   | Cornaceae                      | Yes |   |   |                                                                                                                                     |

|                                                                  |                               |                                                                                                                                     |  |                                                 |                |     |   |  |                                                                                                                                      |
|------------------------------------------------------------------|-------------------------------|-------------------------------------------------------------------------------------------------------------------------------------|--|-------------------------------------------------|----------------|-----|---|--|--------------------------------------------------------------------------------------------------------------------------------------|
| <b>Coronopo o Erba stella</b>                                    | Leaves                        | Leaves are boiled, if necessary twice with water change, then pounded, sieved and added to bread dough                              |  | <i>Plantago coronopus</i> L.                    | Plantaginaceae | Yes |   |  |                                                                                                                                      |
| <b>Crimmo detto Finocchio Marino, Bacicci, o Erba San Pietro</b> | Leaves and Seeds              | Dried and pulverized leaves and seeds, can be added to bread dough to improve the flavour of bland, cloying or flatulent mixtures   |  | <i>Crithmum maritimum</i> L.                    | Apiaceae       | Yes |   |  |                                                                                                                                      |
| <b>Cruciata</b>                                                  | Tips or tops and tender twigs | Tips, tops or tender twigs must be cooked before adding them to bread dough                                                         |  | <i>Cruciata glabra</i> (L.) C. Bauhin ex Opiz   | Rubiaceae      | No  |   |  |                                                                                                                                      |
| <b>Dente di Leone</b>                                            | Leaves and tops               | Raw leaves and tops are crushed and added to bread dough                                                                            |  | <i>Taraxacum officinale</i> Weber s.l.          | Asteraceae     | Yes |   |  |                                                                                                                                      |
| <b>Dissaco o Labrum Veneris o Scardaccio</b>                     | Leaves                        | Leaves are boiled, if necessary twice with water change, then pounded, sieved and added to bread dough                              |  | <i>Dipsacus fullonum</i> L.                     | Caprifoliaceae | Yes |   |  |                                                                                                                                      |
| <b>Draba</b>                                                     | Leaves                        | Leaves are useful against scurvy                                                                                                    |  | <i>Drabella muralis</i> (L.) Fourr.             | Brassicaceae   | No  |   |  |                                                                                                                                      |
| <b>Echio</b>                                                     | Leaves                        | Leaves are boiled, if necessary twice with water change, then pounded, sieved and added to bread dough                              |  | <i>Echium italicum</i> L.                       | Boraginaceae   | Yes | T |  |                                                                                                                                      |
|                                                                  |                               |                                                                                                                                     |  | <i>Echium vulgare</i> L.                        |                | Yes | T |  | Leaves are poisonous                                                                                                                 |
| <b>Edisaro detto Lupinello</b>                                   | Tips or tops and tender twigs | Tips, tops or tender twigs must be cooked before adding them to bread dough                                                         |  | <i>Sulla coronaria</i> (L.) B.H.Choi & H.Ohashi | Fabaceae       | Yes |   |  |                                                                                                                                      |
| <b>Emionitide</b>                                                | Leaves                        | Leaves are boiled, if necessary twice with water change, then pounded, sieved and added to bread dough                              |  | <i>Asplenium sagittatum</i> (DC.) Bange         | Aspleniaceae   | No  |   |  |                                                                                                                                      |
|                                                                  | Tips or tops and tender twigs | Tips, tops or tender twigs must be cooked before adding them to bread dough                                                         |  |                                                 |                |     |   |  |                                                                                                                                      |
| <b>Equiseto detto Coda di Cavallo</b>                            | Young sprouts                 | Cooked young sprouts can be added to bread, but it would be better to eat them alone                                                |  | <i>Equisetum arvense</i> L.                     | Equisetaceae   | Yes |   |  | It contains <i>thiaminase</i> , an enzyme that robs the body of its vitamin B complex, which is destroyed by heat or thorough drying |
|                                                                  |                               |                                                                                                                                     |  | <i>Equisetum hyemale</i> L.                     |                | No  |   |  |                                                                                                                                      |
|                                                                  |                               |                                                                                                                                     |  | <i>Equisetum sylvaticum</i> L.                  |                | No  |   |  | The plant also contains equisetin acid.                                                                                              |
| <b>Erba Kali</b>                                                 | Leaves and tops               | Finely crushed and sifted, are used instead of salt to flavour bread doughs                                                         |  | <i>Salsola kali</i> L.                          | Amaranthaceae  | No  |   |  | It contain up to 5% oxalic acid, the quantity of which can be reduced by cooking.                                                    |
|                                                                  |                               |                                                                                                                                     |  | <i>Salsola tragus</i> L.                        |                | No  |   |  |                                                                                                                                      |
|                                                                  |                               |                                                                                                                                     |  | <i>Soda inermis</i> Fourr.                      | Chenopodiaceae | Yes |   |  |                                                                                                                                      |
| <b>Eringio o Calcatreppola</b>                                   | Roots                         | The roots, boiled a first time with a small bag of ashes and a second time with pure water, are sieved and added to the bread dough |  | <i>Eryngium campestre</i> L.                    | Apiaceae       | Yes |   |  |                                                                                                                                      |



|                                           |                                        |                                                                                                                                                                                                              |   |                                         |                                   |     |   |   |                                                                                                                                                                                         |
|-------------------------------------------|----------------------------------------|--------------------------------------------------------------------------------------------------------------------------------------------------------------------------------------------------------------|---|-----------------------------------------|-----------------------------------|-----|---|---|-----------------------------------------------------------------------------------------------------------------------------------------------------------------------------------------|
| <b><i>Erucaggine detta Cascellore</i></b> | Leaves                                 | Leaves are boiled, if necessary twice with water change, then pounded, sieved and added to bread dough                                                                                                       |   | <i>Bunias erucago</i> L.                | Brassicaceae                      | Yes |   |   |                                                                                                                                                                                         |
| <b><i>Eupatorio Cannabino</i></b>         | Tips or tops and tender twigs          | Tips, tops or tender twigs must be cooked before adding them to bread dough                                                                                                                                  |   | <i>Eupatorium cannabinum</i> L.         | Asteraceae                        | Yes |   | T |                                                                                                                                                                                         |
| <b><i>Faggiuole Faggio</i></b>            | Seeds<br>Tips or tops and tender twigs | Dried seeds, once peeled, are ground in order to obtain flour to be mixed with bread dough<br>Tips, tops or tender twigs must be cooked before adding them to bread dough                                    |   | <i>Fagus sylvatica</i> L.               | Fagaceae                          | Yes |   |   | Seeds may be toxic in large quantities                                                                                                                                                  |
| <b><i>Fagiuoli</i></b>                    | Seeds                                  | The seeds are boiled to make a mush to be mixed with the bread dough                                                                                                                                         | C | <i>Phaseolus vulgaris</i> L.            | Fabaceae                          | No  |   |   | Raw mature seed are poisonous in large quantities                                                                                                                                       |
| <b><i>Farfarugio</i></b>                  | Leaves                                 | Leaves are boiled, if necessary twice with water change, then pounded, sieved and added to bread dough                                                                                                       |   | <i>Caltha palustris</i> L.              | Ranunculaceae                     | No  | T | T | The whole plant, but especially the older portions, contains the toxic glycoside <i>protoanemonin</i> which is destroyed by heat.                                                       |
|                                           |                                        |                                                                                                                                                                                                              |   | <i>Tussilago farfara</i> L.             | See <i>Tosillaggine o Farfero</i> |     |   |   |                                                                                                                                                                                         |
| <b><i>Farnia</i></b>                      | Tips or tops and tender twigs          | Tips, tops or tender twigs must be cooked before adding them to bread dough                                                                                                                                  |   | <i>Quercus robur</i> L.                 | Fagaceae                          | Yes |   |   | Possible digestive complaints.                                                                                                                                                          |
| <b><i>Favagello</i></b>                   | Roots                                  | The roots, boiled to one water and sieved can be added to the bread dough                                                                                                                                    |   | <i>Ficaria verna</i> Huds.              | Ranunculaceae                     | Yes |   | T | It is poisonous. The toxins, unstable and of low toxicity, are destroyed by heat or drying.                                                                                             |
| <b><i>Fave</i></b>                        | Seeds<br>Leaves and tops               | The seeds are boiled to make a mush to be mixed with the bread dough<br>Raw leaves and tops are crushed and added to bread dough                                                                             | C | <i>Vicia faba</i> L.                    | Fabaceae                          | No  |   |   | Although often used as an edible seed, there is a report that eating the seed of this plant can cause the disease 'Favism' in susceptible people.                                       |
| <b><i>Felce femmina</i></b>               | Roots                                  | The procedure is described in Table 1                                                                                                                                                                        | T | <i>Athyrium filix-femina</i> (L.) Roth  | Pteridaceae                       | Yes |   |   | Although we have found no reports for this species, a number of ferns also contain carcinogens                                                                                          |
| <b><i>Felce maschia</i></b>               | Roots                                  | The procedure is described in Table 1                                                                                                                                                                        | T | <i>Dryopteris filix-mas</i> (L.) Schott | Dryopteridaceae                   | No  | T |   | Although we have found no reports for this species, a number of ferns contain carcinogens                                                                                               |
| <b><i>Filipendula</i></b>                 | Roots                                  | The dried roots are crushed and sieved and the resulting powder is boiled, then decanted and the water is thrown away to add new water and boiled a second time, then the powder is added to the bread dough |   | <i>Filipendula ulmaria</i> (L.) Maxim.  | Rosaceae                          | Yes |   |   | Avoid for asthmatics. Use by children for diarrhoea not recommended or for children under 12 due to salicylate content (risk of Reye's syndrome)                                        |
|                                           |                                        |                                                                                                                                                                                                              |   | <i>Oenanthe pimpinelloides</i> L.       | Apiaceae                          | Yes |   |   | Many species in this genus are very poisonous, one report has been found so far saying that this species is also poisonous. It is said to contain the alleged 'psychotroph' myristicine |
| <b><i>Finocchio</i></b>                   | Leaves and Seeds                       | Boil seeds with legumes, or use their decoction to knead bread that contains legume flour, to avoid mixtures that may cause flatulence                                                                       |   | <i>Foeniculum vulgare</i> Mill.         |                                   | Yes | T |   |                                                                                                                                                                                         |

|                                            |                               |                                                                                                                                                                                            |   |                                                            |              |     |   |   |                                                                        |
|--------------------------------------------|-------------------------------|--------------------------------------------------------------------------------------------------------------------------------------------------------------------------------------------|---|------------------------------------------------------------|--------------|-----|---|---|------------------------------------------------------------------------|
|                                            |                               | Dried and pulverized leaves and seeds, can be added to bread dough to improve the flavour of bland, cloying or flatulent mixtures                                                          |   |                                                            |              |     |   |   |                                                                        |
| <b>Formentone, Grano Siciliano o Turco</b> | Seeds                         | Dried seeds are ground into bread flour                                                                                                                                                    | C | <i>Zea mays</i> L.                                         | Poaceae      | No  |   |   |                                                                        |
| <b>Fragole</b>                             | Leaves                        | Leaves are boiled, if necessary twice with water change, then pounded, sieved and added to bread dough                                                                                     |   | <i>Fragaria vesca</i> L.                                   | Rosaceae     | Yes |   |   |                                                                        |
| <b>Frassino</b>                            | Seeds                         | The seeds, bitter, must be boiled with a double change of water and then left three days in running water. Once dried, they are ground in order to obtain flour to be mixed to bread dough |   | <i>Fraxinus excelsior</i> L.                               | Oleaceae     | No  |   |   |                                                                        |
| <b>Fuchi marini</b>                        |                               | Finely crushed and sifted, are used instead of salt to flavour bread doughs                                                                                                                |   | <i>Sargassum natans</i> (L.) Gaillon                       | Sargassaceae | No  |   |   |                                                                        |
|                                            |                               |                                                                                                                                                                                            |   | <i>Fucus vesiculosus</i> L.                                | Fucaceae     | No  |   |   |                                                                        |
| <b>Galega detta Capraggine</b>             | Tips or tops and tender twigs | Tips, tops or tender twigs must be cooked before adding them to bread dough                                                                                                                |   | <i>Galega officinalis</i> L.                               | Fabaceae     | Yes |   |   | A few reports exist of toxicity to mammals                             |
| <b>Girasole o Pianta Massima</b>           | Seeds                         | Seeds crushed and pressed in water produce an aromatic water that serves as a flavouring agent for baking flours with a sour or bitter taste                                               | C | <i>Helianthus annuus</i> L.                                | Asteraceae   | No  |   |   |                                                                        |
| <b>Gramigne</b>                            | Roots                         | The roots, fresh or boiled, are crushed and added to bread dough                                                                                                                           |   | <i>Cynodon dactylon</i> (L.) Pers.                         | Poaceae      | Yes |   |   |                                                                        |
|                                            | Leaves and tops               | Raw leaves and tops are crushed and added to bread dough                                                                                                                                   |   | <i>Elymus repens</i> (L.) Gould subsp. <i>repens</i>       |              | Yes |   |   | Prolonged use may lead to loss of potassium due to its diuretic action |
| <b>Gran Farro</b>                          | Seeds                         | Dried seeds are ground into bread flour                                                                                                                                                    | C | <i>Triticum aestivum</i> subsp. <i>spelta</i> (L.) Thell.  |              | No  |   |   |                                                                        |
| <b>Grano duro</b>                          | Seeds                         | Dried seeds are ground into bread flour                                                                                                                                                    | C | <i>Triticum turgidum</i> subsp. <i>durum</i> (Desf.) Husn. |              | No  |   |   |                                                                        |
| <b>Grano dolce sì Gentile, che Grosso</b>  | Seeds                         | Dried seeds are ground into bread flour                                                                                                                                                    | C | <i>Triticum aestivum</i> L.                                |              | No  |   |   |                                                                        |
| <b>Iacea</b>                               | Tips or tops and tender twigs | Tips, tops or tender twigs must be cooked before adding them to bread dough                                                                                                                |   | <i>Viola tricolor</i> L.                                   | Violaceae    | Yes |   |   |                                                                        |
| <b>Iacobea</b>                             | Tips or tops and tender twigs | Tips, tops or tender twigs must be cooked before adding them to bread dough                                                                                                                |   | <i>Jacobaea vulgaris</i> Gaertn.                           | Asteraceae   | No  | T | T | It is poisonous (pyrrolizidine alkaloids)                              |
| <b>Iberide</b>                             | Leaves                        | Leaves are useful against scurvy                                                                                                                                                           |   | <i>Lepidium graminifolium</i> L.                           | Brassicaceae | Yes |   |   |                                                                        |

|                                                                        |                                       |                                                                                                                                                                                                                                                                                                                        |   |                                           |               |     |  |                                                                                                                                      |
|------------------------------------------------------------------------|---------------------------------------|------------------------------------------------------------------------------------------------------------------------------------------------------------------------------------------------------------------------------------------------------------------------------------------------------------------------|---|-------------------------------------------|---------------|-----|--|--------------------------------------------------------------------------------------------------------------------------------------|
| <b><i>Ieracj di sapor dolce</i></b><br><b><i>Ieraci amarognoli</i></b> | Leaves and tops (sweet or bland ones) | Raw leaves and tops are crushed and added to bread dough<br>Leaves are boiled, if necessary twice with water change, then pounded, sieved and added to bread dough                                                                                                                                                     |   | <i>Pilosella officinarum</i> Vaill.       | Asteraceae    | Yes |  |                                                                                                                                      |
|                                                                        |                                       |                                                                                                                                                                                                                                                                                                                        |   | <i>Hieracium sabaudum</i> L.              |               | No  |  |                                                                                                                                      |
|                                                                        | Leaves (bitter ones)                  |                                                                                                                                                                                                                                                                                                                        |   | <i>Hieracium umbellatum</i> L.            |               | No  |  |                                                                                                                                      |
| <b><i>Iride montana o Giaggiuolo</i></b>                               | Roots                                 | The procedure is described in Table 1                                                                                                                                                                                                                                                                                  | T | <i>Iris florentina</i> L.                 | Iridaceae     | No  |  | The rhizomes contain an irritating resinous substance called <i>irisin</i> . If ingested this can cause severe gastric disturbances. |
|                                                                        |                                       |                                                                                                                                                                                                                                                                                                                        | T | <i>Iris germanica</i> L.                  |               | Yes |  |                                                                                                                                      |
| <b><i>Istia</i></b>                                                    | Tips or tops and tender twigs         | Tips, tops or tender twigs must be cooked before adding them to bread dough                                                                                                                                                                                                                                            |   | <i>Phillyrea latifolia</i> L.             | Oleaceae      | No  |  |                                                                                                                                      |
| <b><i>Lampone</i></b>                                                  | Fruits                                | Small fruits, dried, can be added directly to bread dough                                                                                                                                                                                                                                                              |   | <i>Rubus idaeus</i> L.                    | Rosaceae      | Yes |  |                                                                                                                                      |
| <b><i>Lapato</i></b>                                                   | Roots                                 | The dried roots are crushed and sieved and the resulting powder is boiled, then decanted and the water is thrown away to add new water and boiled a second time, then the powder is added to the bread dough<br>Leaves are boiled, if necessary twice with water change, then pounded, sieved and added to bread dough |   | <i>Rumex conglomeratus</i> Murray         | Polygonaceae  | Yes |  | Leaves can contain high levels of oxalic acid, the quantity of which can be reduced by cooking.                                      |
|                                                                        | Leaves                                |                                                                                                                                                                                                                                                                                                                        |   | <i>Rumex sanguineus</i> L.                |               | Yes |  |                                                                                                                                      |
| <b><i>Leccio</i></b>                                                   | Seeds                                 | Dried seeds are ground in order to obtain flour. Before using it, acorn flour must be boiled until it becomes a liquid paste, then it is added to bread dough                                                                                                                                                          |   | <i>Quercus ilex</i> L. subsp. <i>ilex</i> | Fagaceae      | Yes |  |                                                                                                                                      |
| <b><i>Lenti</i></b>                                                    | Seeds                                 | The seeds are boiled to make a mush to be mixed with the bread dough                                                                                                                                                                                                                                                   | C | <i>Vicia lens</i> (L.) Coss. & Germ.      | Fabaceae      | No  |  |                                                                                                                                      |
| <b><i>Lenticchia Palustre</i></b>                                      | Leaves and tops                       | Raw leaves and tops are crushed and added to bread dough                                                                                                                                                                                                                                                               |   | <i>Lemna minor</i> L.                     | Araceae       | No  |  |                                                                                                                                      |
|                                                                        |                                       |                                                                                                                                                                                                                                                                                                                        |   | <i>Spirodela polyrhiza</i> (L.) Schleid.  |               | No  |  |                                                                                                                                      |
| <b><i>Lentisco</i></b>                                                 | Seeds                                 | Seeds crushed and pressed in water produce an aromatic water that serves as a flavouring agent for baking flours with a sour or bitter taste                                                                                                                                                                           |   | <i>Pistacia lentiscus</i> L.              | Anacardiaceae | Yes |  | Small risk of diarrhoea in children. Avoid oral intake of essential oil                                                              |
| <b><i>Lepidio</i></b>                                                  | Leaves                                | Leaves are useful against scurvy                                                                                                                                                                                                                                                                                       |   | <i>Lepidium latifolium</i> L.             | Brassicaceae  | Yes |  |                                                                                                                                      |
| <b><i>Licheni</i></b>                                                  | Thallus                               | Lichen dried and reduced in powder, can be added to bread dough                                                                                                                                                                                                                                                        |   | <i>Cetraria islandica</i> (L.) Ach.       | Parmeliaceae  | No  |  | Indigestion and nausea with large doses. Rare liver damage.                                                                          |
| <b><i>Lingua Cervina</i></b>                                           | Leaves                                | Leaves are boiled, if necessary twice with water change, then pounded, sieved and added to bread dough                                                                                                                                                                                                                 |   | <i>Asplenium scolopendrium</i> L.         | Aspleniaceae  | No  |  | Although we have found no reports of toxicity for this species, a number of ferns contain carcinogens.                               |

|                                                       |                               |                                                                                                                                                                                                                     |   |                                                    |                 |     |   |   |                                                                                                                                                                                                                                                            |
|-------------------------------------------------------|-------------------------------|---------------------------------------------------------------------------------------------------------------------------------------------------------------------------------------------------------------------|---|----------------------------------------------------|-----------------|-----|---|---|------------------------------------------------------------------------------------------------------------------------------------------------------------------------------------------------------------------------------------------------------------|
|                                                       | Tips or tops and tender twigs | Tips, tops or tender twigs must be cooked before adding them to bread dough                                                                                                                                         |   |                                                    |                 |     |   |   | Many ferns contain <i>thiaminase</i> , an enzyme that robs the body of its vitamin B complex, which is destroyed by heat or thorough drying                                                                                                                |
| <b>Linnide</b>                                        | Tips or tops and tender twigs | Tips, tops or tender twigs must be cooked before adding them to bread dough                                                                                                                                         |   | <i>Lychnis coronaria</i> (L.) Desr.                | Caryophyllaceae | No  |   |   |                                                                                                                                                                                                                                                            |
|                                                       |                               |                                                                                                                                                                                                                     |   | <i>Silene dioica</i> (L.) Clairv.                  |                 | Yes |   |   | The plant contain saponins, which are very poorly absorbed by the body and are also broken down by thorough cooking.                                                                                                                                       |
| <b>Linnide saponaria</b><br><b>Erba saponaria</b>     | Leaves and tops               | Raw leaves and tops are crushed and added to bread dough                                                                                                                                                            |   | <i>Saponaria officinalis</i> L.                    |                 | Yes | T | T | The leaves contain saponins, which are very poorly absorbed by the body and are also broken down by thorough cooking.                                                                                                                                      |
| <b>Lino</b>                                           | Seeds                         | Dried seeds are ground in order to obtain flour to be mixed with bread dough as long as in small quantity                                                                                                           | C | <i>Linum usitatissimum</i> L.                      | Linaceae        | Yes |   |   | The seed can contain cyanogenic glycosides                                                                                                                                                                                                                 |
| <b>Loto Pratense</b>                                  | Tips or tops and tender twigs | Tips, tops or tender twigs must be cooked before adding them to bread dough                                                                                                                                         |   | <i>Lotus maritimus</i>                             | Fabaceae        | Yes |   |   |                                                                                                                                                                                                                                                            |
| <b>Loto detto Fraggiragolo, o Bagatto, o Bucerata</b> | Fruits                        | Sour fruits, fresh or dried, are cooked in water, sieved and then added to bread dough                                                                                                                              |   | <i>Celtis australis</i> L. subsp. <i>australis</i> | Ulmaceae        | Yes |   |   |                                                                                                                                                                                                                                                            |
| <b>Lunaria</b>                                        | Tips or tops and tender twigs | Tips, tops or tender twigs must be cooked before adding them to bread dough                                                                                                                                         |   | <i>Lunaria annua</i> L.                            | Brassicaceae    | Yes |   |   |                                                                                                                                                                                                                                                            |
| <b>Lupini</b>                                         | Seeds                         | The seeds, bitter, must be boiled with a double change of water and then left three days in running water. Once dried, the shell is removed and they are ground in order to obtain flour to be mixed to bread dough |   | <i>Lupinus albus</i> L.                            | Fabaceae        | Yes | T |   | The seed of many species of this genus contain bitter-tasting toxic alkaloids. These alkaloids can be leached out of the seed by soaking it overnight and discarding the soak water, but it may also be necessary to change the water once during cooking. |
| <b>Luppolo</b>                                        | Young sprouts                 | Cooked young sprouts can be added to bread, but it would be better to eat them alone                                                                                                                                |   | <i>Humulus lupulus</i> L.                          | Cannabaceae     | Yes |   |   | Skin contact with the plant causes dermatitis in sensitive people. Dislodged hairs from the plant can irritate the eyes. Sedative effect may worsen depression. Avoid during pregnancy (due to antispasmodic action on uterus).                            |
| <b>Macerone</b>                                       | Tips or tops and tender twigs | Tips, tops or tender twigs must be cooked before adding them to bread dough                                                                                                                                         |   | <i>Smyrniolum olusatrum</i> L.                     | Apiaceae        | Yes |   |   |                                                                                                                                                                                                                                                            |
| <b>Malva</b>                                          | Leaves                        | Leaves are boiled, if necessary twice with water change, then pounded, sieved and added to bread dough                                                                                                              |   | <i>Malva neglecta</i> Wallr.                       | Malvaceae       | Yes |   |   | Leaves can concentrate harmful amounts of nitrates if the plant grows on nitrogen-rich soils                                                                                                                                                               |
|                                                       |                               |                                                                                                                                                                                                                     |   | <i>Malva sylvestris</i> L.                         |                 | Yes |   |   |                                                                                                                                                                                                                                                            |
| <b>Medica</b>                                         | Leaves and tops               | Raw leaves and tops are crushed and added to bread dough                                                                                                                                                            |   | <i>Medicago sativa</i> L.                          | Fabaceae        | Yes |   |   | The leaves contain <i>saponins</i> -like substances, which are very poorly absorbed by the body and                                                                                                                                                        |

|                                                  |                                             |                                                                                                                                                                                                                                                                                                                                           |   |                                        |                     |     |  |   |                                                                                                                                                                                                                                                                                                                     |
|--------------------------------------------------|---------------------------------------------|-------------------------------------------------------------------------------------------------------------------------------------------------------------------------------------------------------------------------------------------------------------------------------------------------------------------------------------------|---|----------------------------------------|---------------------|-----|--|---|---------------------------------------------------------------------------------------------------------------------------------------------------------------------------------------------------------------------------------------------------------------------------------------------------------------------|
|                                                  |                                             |                                                                                                                                                                                                                                                                                                                                           |   |                                        |                     |     |  |   | are also broken down by thorough cooking (and perhaps changing the cooking water once).<br><br>The sprouts (and especially the seeds) contain <i>canavanine</i> , which can cause the recurrence of systemic lupus erythematosus in patients where the disease had become dormant.                                  |
| <b>Melampiro o Grano Vaccino o Bovino o Nero</b> | Seeds                                       | Dried seeds are ground in order to obtain flour to be mixed with bread dough                                                                                                                                                                                                                                                              |   | <i>Melampyrum arvense</i> L            | Orobanchaceae       | No  |  | T |                                                                                                                                                                                                                                                                                                                     |
| <b>Mele Melo</b>                                 | Fruits<br><br>Tips or tops and tender twigs | Sweet fruits, dried in segments, can be crushed and mixed to bread dough; alternatively, fresh or dried segments can be cooked first and then added to bread dough; sour fruits, fresh or dried, are cooked in water, sieved and then added to bread dough<br>Tips, tops or tender twigs must be cooked before adding them to bread dough | C | <i>Malus domestica</i> (Suckow) Borkh. | Rosaceae            | Yes |  |   |                                                                                                                                                                                                                                                                                                                     |
| <b>Melissa detta Cedrencella</b>                 | Leaves and tops                             | Dried and pulverized leaves and tops, can be added to bread dough to improve the flavour of bland, cloying or flatulent mixtures                                                                                                                                                                                                          |   | <i>Melissa officinalis</i> L.          | Lamiaceae           | Yes |  |   | Can cause irritation in high concentrates. Avoid during pregnancy. Care if sensitive skin                                                                                                                                                                                                                           |
| <b>Menta</b>                                     | Leaves and tops                             | Dried and pulverized leaves and tops, can be added to bread dough to improve the flavour of bland, cloying or flatulent mixtures                                                                                                                                                                                                          |   | <i>Mentha spicata</i> L.               |                     | Yes |  |   | In large quantities it can cause abortions                                                                                                                                                                                                                                                                          |
|                                                  |                                             |                                                                                                                                                                                                                                                                                                                                           |   | <i>Mentha x piperita</i> L.            |                     | Yes |  |   |                                                                                                                                                                                                                                                                                                                     |
| <b>Mentastro</b>                                 | Leaves and tops                             | Dried and pulverized leaves and tops, can be added to bread dough to improve the flavour of bland, cloying or flatulent mixtures                                                                                                                                                                                                          |   | <i>Mentha longifolia</i> (L.) L.       |                     | Yes |  |   | Large quantities of some members of this genus can cause abortions                                                                                                                                                                                                                                                  |
|                                                  |                                             |                                                                                                                                                                                                                                                                                                                                           |   | <i>Mentha suaveolens</i> Ehrh.         |                     | Yes |  |   |                                                                                                                                                                                                                                                                                                                     |
| <b>Miglio, Panico</b>                            | Seeds                                       | Dried seeds are ground into bread flour                                                                                                                                                                                                                                                                                                   | C | <i>Panicum miliaceum</i> L.            | Poaceae             | Yes |  |   |                                                                                                                                                                                                                                                                                                                     |
| <b>Mocaione</b>                                  | Seeds                                       | The seeds are boiled to make a mush to be mixed with the bread dough                                                                                                                                                                                                                                                                      |   | <i>Lathyrus latifolius</i> L.          | Fabaceae            | Yes |  |   | Although no records of toxicity have been found for this plant, the seed of some species in this genus contain a toxic amino-acid which can cause 'lathyrism' (a disease of the nervous system) if ingested in large quantities. The amino-acid is produced at about the same time that the seed starts to develop. |
|                                                  |                                             |                                                                                                                                                                                                                                                                                                                                           |   | <i>(Lathyrus sylvestris)</i>           | See <b>Roviglie</b> |     |  |   |                                                                                                                                                                                                                                                                                                                     |
| <b>Mochi</b>                                     | Seeds                                       | The seeds are boiled to make a mush to be mixed with the bread dough                                                                                                                                                                                                                                                                      |   | <i>Lathyrus cicera</i> L.              | Fabaceae            | Yes |  |   | All parts of the plant, but especially the seed, contain a toxic amino-acid which can cause 'lathyrism' (a disease of the nervous system) if ingested in large quantities. The amino-acid is produced at about the same time that the seed starts to develop.                                                       |
|                                                  |                                             |                                                                                                                                                                                                                                                                                                                                           |   | <i>(Ervilia sativa)</i>                | See <b>Veggioli</b> |     |  |   |                                                                                                                                                                                                                                                                                                                     |

|                                                        |                               |                                                                                                                                              |   |                                                            |                 |     |   |   |                                                                                                  |
|--------------------------------------------------------|-------------------------------|----------------------------------------------------------------------------------------------------------------------------------------------|---|------------------------------------------------------------|-----------------|-----|---|---|--------------------------------------------------------------------------------------------------|
| <b>More di Rovo</b>                                    | Fruits                        | Small fruits, dried, can be added directly to bread dough                                                                                    |   | <i>Rubus caesius</i> L.                                    | Rosaceae        | Yes |   |   |                                                                                                  |
| <b>Moro</b>                                            | Tips or tops and tender twigs | Tips, tops or tender twigs must be cooked before adding them to bread dough                                                                  |   | <i>Morus alba</i> L.                                       | Moraceae        | Yes |   |   |                                                                                                  |
|                                                        |                               |                                                                                                                                              |   | <i>Morus nigra</i>                                         |                 | No  |   |   |                                                                                                  |
| <b>Mortella</b>                                        | Fruits                        | Sour fruits, fresh or dried, are cooked in water, sieved and then added to bread dough                                                       |   | <i>Myrtus communis</i> L.                                  | Myrtaceae       | Yes |   |   |                                                                                                  |
| <b>Mustin Greco salvatico detto Gettaione</b>          | Roots                         | The roots, boiled a first time with a small bag of ashes and a second time with pure water, are sieved and added to the bread dough          |   | <i>Agrostemma githago</i> L.                               | Caryophyllaceae | Yes | T | T |                                                                                                  |
| <b>Narcisi salvatici detti Moschettoni</b>             | Roots                         | The roots, boiled a first time with a small bag of ashes and a second time with pure water, are sieved and added to the bread dough          |   | <i>Narcissus pseudonarcissus</i> L.                        | Amaryllidaceae  | No  |   | T |                                                                                                  |
| <b>Nasturzio Aquatico</b><br><b>Sisimbrio Aquatico</b> | Leaves                        | Leaves are useful against scurvy                                                                                                             |   | <i>Rorippa palustris</i> (L.) Besser                       | Brassicaceae    | No  |   |   |                                                                                                  |
| <b>Nepitella</b>                                       | Leaves and tops               | Dried and pulverized leaves and tops, can be added to bread dough to improve the flavour of bland, cloying or flatulent mixtures             |   | <i>Clinopodium nepeta</i> (L.) Kuntze subsp. <i>nepeta</i> | Lamiaceae       | Yes |   |   |                                                                                                  |
| <b>Nespole salvatiche</b>                              | Fruits                        | Sour fruits, fresh or dried, are cooked in water, sieved and then added to bread dough                                                       | C | <i>Mespilus germanica</i> L.                               | Rosaceae        | Yes |   |   |                                                                                                  |
| <b>Ninfea di fior giallo</b>                           | Seeds                         | Seeds crushed and pressed in water produce an aromatic water that serves as a flavouring agent for baking flours with a sour or bitter taste |   | <i>Nuphar lutea</i> (L.) Sm.                               | Nymphaeaceae    | Yes |   |   |                                                                                                  |
|                                                        | Roots                         | Young roots, fresh or boiled, are crushed and added to bread dough                                                                           |   |                                                            |                 |     |   |   |                                                                                                  |
| <b>Ninfea fiori bianchi</b>                            | Seeds                         | Seeds crushed and pressed in water produce an aromatic water that serves as a flavouring agent for baking flours with a sour or bitter taste |   | <i>Nymphaea alba</i> L.                                    |                 | Yes |   | T | The toxic alkaloids <i>nupharine</i> and <i>nymphaeinae</i> have an effect on the nervous system |
|                                                        | Roots                         | Young roots, fresh or boiled, are crushed and added to bread dough                                                                           |   |                                                            |                 |     |   |   |                                                                                                  |
| <b>Nocciuole o Avellane salvatiche</b>                 | Seeds                         | Dried seeds, once peeled, are ground in order to obtain flour to be mixed with bread dough                                                   |   | <i>Corylus avellana</i> L.                                 | Betulaceae      | Yes |   |   |                                                                                                  |
| <b>Noci</b>                                            | Seeds                         | The seeds can be used to modify the bitter and sour taste of some acorns                                                                     |   | <i>Juglans regia</i> L.                                    | Juglandaceae    | Yes |   |   |                                                                                                  |
| <b>Nummularia</b>                                      | Tips or tops and tender twigs | Tips, tops or tender twigs must be cooked before adding them to bread dough                                                                  |   | <i>Lysimachia nummularia</i> L.                            | Primulaceae     | No  |   |   |                                                                                                  |

|                                                        |                               |                                                                                                                                                  |   |                                                                       |                    |     |   |                                                                                                                                                                                                                        |
|--------------------------------------------------------|-------------------------------|--------------------------------------------------------------------------------------------------------------------------------------------------|---|-----------------------------------------------------------------------|--------------------|-----|---|------------------------------------------------------------------------------------------------------------------------------------------------------------------------------------------------------------------------|
| <b><i>Ocimoide bianco</i></b>                          | Tips or tops and tender twigs | Tips, tops or tender twigs must be cooked before adding them to bread dough                                                                      |   | ( <i>Silene dioica</i> L.)                                            | See <i>Linnide</i> |     |   |                                                                                                                                                                                                                        |
|                                                        |                               |                                                                                                                                                  |   | <i>Silene latifolia</i> Poir.                                         | Caryophyllaceae    | Yes |   | The plant contain saponins, which are very poorly absorbed by the body and are also broken down by thorough cooking                                                                                                    |
| <b><i>Ocro</i></b>                                     | Seeds                         | The seeds are boiled to make a mush to be mixed with the bread dough                                                                             |   | <i>Lathyrus ochrus</i> (L.) DC.                                       | Fabaceae           | Yes |   | Seeds might be poisonous in large quantities                                                                                                                                                                           |
| <b><i>Onobrichide</i></b>                              | Leaves and tops               | Raw leaves and tops are crushed and added to bread dough                                                                                         |   | <i>Onobrychis viciifolia</i> Scop.                                    |                    | Yes |   |                                                                                                                                                                                                                        |
| <b><i>Onopordo o Acanzio</i></b>                       | Tips or tops and tender twigs | Tips, tops or tender twigs must be cooked before adding them to bread dough                                                                      |   | <i>Onopordum acanthium</i> L.                                         | Asteraceae         | Yes |   |                                                                                                                                                                                                                        |
| <b><i>Origano detto Regamo ed Erba da Acciughe</i></b> | Leaves and tops               | Dried and pulverized leaves and tops, can be added to bread dough to improve the flavour of bland, cloying or flatulent mixtures                 |   | <i>Origanum vulgare</i> L.                                            | Lamiaceae          |     |   |                                                                                                                                                                                                                        |
| <b><i>Ornitogalo bianco o Latte di gallina</i></b>     | Roots                         | The roots, boiled a first time with a small bag of ashes and a second time with pure water, are sieved and added to the bread dough              |   | <i>Ornithogalum umbellatum</i> L.                                     | Asparagaceae       | Yes | T | The bulb contains alkaloids and is poisonous.                                                                                                                                                                          |
| <b><i>Ornitogalo giallo</i></b>                        | Roots                         | The roots, boiled a first time with a small bag of ashes and a second time with pure water, are sieved and added to the bread dough              |   | <i>Gagea lutea</i> (L.) Ker Gawl.                                     | Liliaceae          | No  |   |                                                                                                                                                                                                                        |
| <b><i>Ortica</i></b>                                   | Young sprouts                 | Cooked young sprouts can be added to bread, but it would be better to eat them alone                                                             |   | <i>Urtica dioica</i> L.                                               | Urticaceae         | Yes |   | The stinging hairs are neutralized by heat or by thorough drying. But only young leaves should be used because older leaves develop gritty particles called <i>cystoliths</i> which act as an irritant to the kidneys. |
|                                                        |                               |                                                                                                                                                  |   | <i>Urtica urens</i> L.                                                |                    | Yes |   |                                                                                                                                                                                                                        |
| <b><i>Orzo, Orzuola</i></b>                            | Seeds                         | Dried seeds are ground into bread flour                                                                                                          | C | <i>Hordeum vulgare</i> L.                                             | Poaceae            | No  |   | Possible trigger for coeliac disease.                                                                                                                                                                                  |
| <b><i>Ossiacanta o Marruca bianca</i></b>              | Fruits                        | Sour fruits, fresh or dried, are cooked in water, sieved and then added to bread dough                                                           |   | <i>Crataegus laevigata</i> (Poir.) DC.                                | Rosaceae           | Yes |   |                                                                                                                                                                                                                        |
| <b><i>Pancaciuolo detto Spadicciuola</i></b>           | Roots                         | The roots, boiled to one water and sieved can be added to the bread dough                                                                        |   | <i>Gladiolus communis</i> L.                                          | Iridaceae          | Yes |   |                                                                                                                                                                                                                        |
|                                                        |                               |                                                                                                                                                  |   | <i>Bunium bulbocastanum</i>                                           | Apiaceae           | Yes |   |                                                                                                                                                                                                                        |
| <b><i>Parietaria o Vetriuola</i></b>                   | Leaves                        | Leaves are boiled, if necessary twice with water change, then pounded, sieved and added to bread dough                                           |   | <i>Parietaria officinalis</i> L.                                      | Urticaceae         | Yes |   |                                                                                                                                                                                                                        |
| <b><i>Pastinache</i></b>                               | Roots                         | Roots, dried in pieces, can be crushed and mixed to bread dough. Alternatively, fresh pieces can be cooked, sieved and then added to bread dough | C | <i>Pastinaca sativa</i> L. subsp. <i>sativa</i>                       | Apiaceae           | Yes |   | It is said to contain myristicine, which is toxic in excess                                                                                                                                                            |
|                                                        |                               |                                                                                                                                                  | C | <i>Pastinaca sativa</i> L. subsp. <i>urens</i> (Req. ex Godr.) Čelak. |                    | Yes |   |                                                                                                                                                                                                                        |

|                                                |                                         |                                                                                                                                                                                                                                             |   |                                                              |                |     |   |   |                                                                                                                                                                          |
|------------------------------------------------|-----------------------------------------|---------------------------------------------------------------------------------------------------------------------------------------------------------------------------------------------------------------------------------------------|---|--------------------------------------------------------------|----------------|-----|---|---|--------------------------------------------------------------------------------------------------------------------------------------------------------------------------|
| <b><i>Pentafillo detto Cinque Foglie</i></b>   | Tips or tops and tender twigs           | Tips, tops or tender twigs must be cooked before adding them to bread dough                                                                                                                                                                 |   | <i>Potentilla reptans</i> L.                                 | Rosaceae       | Yes |   |   |                                                                                                                                                                          |
| <b><i>Peonia</i></b>                           | Roots                                   | The procedure is described in table 1                                                                                                                                                                                                       | T | <i>Paeonia officinalis</i> L.                                | Paeoniaceae    | No  | T |   | It is poisonous if taken in large doses                                                                                                                                  |
| <b><i>Pere Pero</i></b>                        | Fruits<br>Tips or tops and tender twigs | Fruits, dried in segments, can be crushed and mixed to bread dough; alternatively, fresh or dried segments can be cooked first and then added to bread dough<br>Tips, tops or tender twigs must be cooked before adding them to bread dough |   | C <i>Pyrus communis</i> L.                                   | Rosaceae       | Yes |   |   |                                                                                                                                                                          |
| <b><i>Perecotogne</i></b>                      | Fruits                                  | Sour fruits, fresh or dried, are cooked in water, sieved and then added to bread dough                                                                                                                                                      |   | C <i>Cydonia oblonga</i> Mill.                               |                | Yes |   |   |                                                                                                                                                                          |
| <b><i>Pesche</i></b>                           | Fruits                                  | Fruits, dried in segments, can be crushed and mixed to bread dough; alternatively fresh or dried segments can be cooked first and then added to bread dough                                                                                 |   | C <i>Prunus persica</i> (L.) Batsch                          |                | Yes |   |   |                                                                                                                                                                          |
| <b><i>Petasite</i></b>                         | Roots                                   | The roots, boiled a first time with a small bag of ashes and a second time with pure water, are sieved and added to the bread dough                                                                                                         |   | <i>Petasites albus</i> (L.) Gaertn.                          | Asteraceae     | Yes | T |   |                                                                                                                                                                          |
|                                                |                                         |                                                                                                                                                                                                                                             |   | <i>Petasites hybridus</i> (L.) G. Gaertn., B. Mey. & Scherb. |                | Yes | T |   |                                                                                                                                                                          |
| <b><i>Piantaggine, Quinquenervia</i></b>       | Leaves                                  | Leaves are boiled, if necessary twice with water change, then pounded, sieved and added to bread dough                                                                                                                                      |   | <i>Plantago lanceolata</i> L.                                | Plantaginaceae | Yes | T |   |                                                                                                                                                                          |
|                                                |                                         |                                                                                                                                                                                                                                             |   | <i>Plantago major</i> L.                                     |                | Yes |   |   | High doses may cause a fall in blood pressure and diarrhoea. Possible allergic contact dermatitis. Avoid in patients with intestinal obstruction or abdominal discomfort |
|                                                |                                         |                                                                                                                                                                                                                                             |   | <i>Plantago media</i> L.                                     |                | Yes |   |   |                                                                                                                                                                          |
| <b><i>Pimpinella detta Salvastrella</i></b>    | Tips or tops and tender twigs           | Tips, tops or tender twigs must be cooked before adding them to bread dough                                                                                                                                                                 |   | <i>Poterium sanguisorba</i> L.                               | Rosaceae       | Yes |   |   |                                                                                                                                                                          |
| <b><i>Pinocchi</i></b>                         | Seeds                                   | Dried seeds are ground in order to obtain flour to be mixed with bread dough                                                                                                                                                                |   | <i>Pinus pinea</i> L.                                        | Pinaceae       | Yes |   |   |                                                                                                                                                                          |
| <b><i>Piracanta o Pruno Gazerino</i></b>       | Fruits                                  | Sour fruits, fresh or dried, are cooked in water, sieved and then added to bread dough                                                                                                                                                      |   | <i>Pyracantha coccinea</i> M. Roem.                          | Rosaceae       | No  |   |   |                                                                                                                                                                          |
| <b><i>Piselli</i></b>                          | Seeds<br>Leaves and tops                | The seeds are boiled to make a mush to be mixed with the bread dough<br>Raw leaves and tops are crushed and added to bread dough                                                                                                            |   | C <i>Lathyrus oleraceus</i> Lam.                             | Fabaceae       | Yes |   |   |                                                                                                                                                                          |
| <b><i>Poligonato o Sigillo di Salomone</i></b> | Young sprouts                           | Cooked young sprouts can be added to bread, but it would be better to eat them alone                                                                                                                                                        |   | <i>Polygonatum multiflorum</i> (L.) All.                     | Asparagaceae   | Yes |   | T |                                                                                                                                                                          |



|                                                            |                                   |                                                                                                                                                      |   |                                          |                  |     |   |   |                                                                                                   |
|------------------------------------------------------------|-----------------------------------|------------------------------------------------------------------------------------------------------------------------------------------------------|---|------------------------------------------|------------------|-----|---|---|---------------------------------------------------------------------------------------------------|
| <b><i>Polmonaria</i></b>                                   | Leaves and tops                   | Raw leaves and tops are crushed and added to bread dough                                                                                             |   | <i>Pulmonaria officinalis</i> L.         | Boraginaceae     | Yes |   |   |                                                                                                   |
| <b><i>Pomi di Terra</i></b>                                | Roots                             | There is only one indication for a desirable, but not yet possible use                                                                               | C | <i>Solanum tuberosum</i> L.              | Solanaceae       | No  | T |   |                                                                                                   |
| <b><i>Poponi, Zatte</i></b>                                | Fruits<br>Tender shoots and vines | Boiled fruit pulp and peel is added to bread dough<br>Cooked tender shoots and vines can be added to bread, but it would be better to eat them alone | C | <i>Cucumis melo</i> L.                   | Cucurbitaceae    | No  |   |   |                                                                                                   |
| <b><i>Populus alba o Gattice</i></b>                       | Tips or tops and tender twigs     | Tips, tops or tender twigs must be cooked before adding them to bread dough                                                                          |   | <i>Populus alba</i> L.                   | Salicaceae       | No  |   |   |                                                                                                   |
| <b><i>Populus nigra detta Albero</i></b>                   | Tips or tops and tender twigs     | Tips, tops or tender twigs must be cooked before adding them to bread dough                                                                          |   | <i>Populus nigra</i> L.                  |                  | No  |   |   |                                                                                                   |
| <b><i>Populus tremula</i></b>                              | Tips or tops and tender twigs     | Tips, tops or tender twigs must be cooked before adding them to bread dough                                                                          |   | <i>Populus tremula</i> L.                |                  | No  |   |   |                                                                                                   |
| <b><i>Porraccio</i></b>                                    | Roots                             | The procedure is described in Table 1                                                                                                                | T | <i>Asphodelus albus</i> Mill.            | Asphodelaceae    | Yes |   |   | The roots are poisonous                                                                           |
| <b><i>Porreca</i></b>                                      | Roots                             | The procedure is described in Table 1                                                                                                                | T | <i>Asphodelus fistulosus</i> L.          |                  | Yes |   |   |                                                                                                   |
| <b><i>Portulaca o Porcellana</i></b>                       | Leaves and tops                   | Raw leaves and tops are crushed and added to bread dough                                                                                             |   | <i>Portulaca oleracea</i> L.             | Portulacaceae    | Yes |   |   |                                                                                                   |
| <b><i>Potamogeto con foglie di Piantaggine</i></b>         | Leaves and tops                   | Raw leaves and tops are crushed and added to bread dough                                                                                             |   | <i>Potamogeton natans</i> L.             | Potamogetonaceae | Yes |   |   |                                                                                                   |
| <b><i>Potentilla o Argentina</i></b>                       | Leaves                            | Leaves are boiled, if necessary twice with water change, then pounded, sieved and added to bread dough                                               |   | <i>Argentina anserina</i> (L.) Rydb.     | Rosaceae         | Yes |   |   | Possible stomach irritation                                                                       |
| <b><i>Prezzemolo</i></b>                                   | Leaves and Seeds                  | Dried and pulverized leaves and seeds, can be added to bread dough to improve the flavour of bland, cloying or flatulent mixtures                    | C | <i>Petroselinum crispum</i> (Mill.) Fuss | Apiaceae         | Yes | T |   | It is said to contain myristicine, which is toxic in excess                                       |
| <b><i>Primulaveris</i></b>                                 | Leaves and tops                   | Raw leaves and tops are crushed and added to bread dough                                                                                             |   | <i>Primula veris</i> L.                  | Primulaceae      | Yes |   |   | Saponins may cause hypotension.                                                                   |
| <b><i>Pseudoacoro o Iride palustre dal fior giallo</i></b> | Roots                             | The procedure is described in table 1                                                                                                                | T | <i>Limniris pseudacorus</i> (L.) Fuss    | Iridaceae        | No  |   | T | The roots are especially likely to be toxic. Should not be used internally except in small doses. |
| <b><i>Puleggio</i></b>                                     | Leaves and tops                   | Dried and pulverized leaves and tops, can be added to bread dough to improve the flavour of bland, cloying or flatulent mixtures                     |   | <i>Mentha pulegium</i> L.                | Lamiaceae        | Yes |   |   | In large quantities it can cause abortions                                                        |

|                            |                               |                                                                                                                                                                                                                                                                                                                                                                            |   |                                       |               |     |  |                                                                                             |
|----------------------------|-------------------------------|----------------------------------------------------------------------------------------------------------------------------------------------------------------------------------------------------------------------------------------------------------------------------------------------------------------------------------------------------------------------------|---|---------------------------------------|---------------|-----|--|---------------------------------------------------------------------------------------------|
| <b>Querce</b>              | Seeds                         | Dried seeds are ground in order to obtain flour. Before using it, acorn flour must be boiled until it becomes a liquid paste, then it is added to bread dough                                                                                                                                                                                                              |   | <i>Quercus petraea</i> (Matt.) Liebl. | Fagaceae      | Yes |  |                                                                                             |
|                            | Tips or tops and tender twigs | Tips, tops or tender twigs must be cooked before adding them to bread dough                                                                                                                                                                                                                                                                                                |   | <i>Quercus pubescens</i> Willd.       |               | Yes |  |                                                                                             |
| <b>Radicchio salvatico</b> | Roots                         | The roots, boiled a first time with a small bag of ashes and a second time with pure water, are sieved and added to the bread dough                                                                                                                                                                                                                                        |   | <i>Cichorium intybus</i> L.           | Asteraceae    | Yes |  | Excessive and continued use may impair function of the retina.                              |
|                            | Leaves                        | Leaves are boiled, if necessary twice with water change, then pounded, sieved and added to bread dough                                                                                                                                                                                                                                                                     |   | <i>Crepis zacintha</i> (L.) Loisel.   |               | Yes |  |                                                                                             |
| <b>Ramerino</b>            | Leaves and tops               | Boil leaves and tops with legumes, or use their decoction to knead bread that contains legume flour, to avoid mixtures that may cause flatulence<br>The leaves and tops can be used to modify the bitter and sour taste of some acorns<br>Dried and pulverized leaves and tops, can be added to bread dough to improve the flavour of bland, cloying or flatulent mixtures |   | <i>Salvia rosmarinus</i> Spenn.       | Lamiaceae     | Yes |  | In large quantities it can cause abortions                                                  |
| <b>Ramolacci</b>           | Roots                         | Roots, dried in pieces, can be crushed and mixed to bread dough. Alternatively, fresh pieces can be cooked, sieved and then added to bread dough                                                                                                                                                                                                                           |   | <i>Raphanus raphanistrum</i> L.       | Brassicaceae  | Yes |  |                                                                                             |
| <b>Rape</b>                | Roots<br>Leaves               | Roots, dried in pieces, can be crushed and mixed to bread dough. Alternatively, fresh pieces can be cooked, sieved and then added to bread dough<br>Leaves are boiled, if necessary twice with water change, then pounded, sieved and added to bread dough                                                                                                                 | C | <i>Brassica rapa</i> L.               |               | Yes |  |                                                                                             |
| <b>Raperonzoli</b>         | Roots                         | Roots, dried in pieces, can be crushed and mixed to bread dough. Alternatively, fresh pieces can be cooked, sieved and then added to bread dough                                                                                                                                                                                                                           |   | <i>Campanula rapunculus</i> L.        | Campanulaceae | Yes |  |                                                                                             |
|                            |                               |                                                                                                                                                                                                                                                                                                                                                                            |   | <i>Tragopogon porrifolius</i> L.      | Asteraceae    | Yes |  |                                                                                             |
| <b>Riso</b>                | Seeds                         | Dried seeds are ground into bread flour                                                                                                                                                                                                                                                                                                                                    | C | <i>Oryza sativa</i> L.                | Poaceae       | Yes |  |                                                                                             |
| <b>Robbia</b>              | Young sprouts                 | Cooked young sprouts can be added to bread, but it would be better to eat them alone                                                                                                                                                                                                                                                                                       |   | <i>Galium mollugo</i> L.              | Rubiaceae     | Yes |  |                                                                                             |
| <b>Romice</b>              | Roots                         | The dried roots are crushed and sieved and the resulting powder is boiled, then decanted and the water is thrown away to add new water and boiled a second time, then the powder is added to the bread dough                                                                                                                                                               |   | <i>Rumex crispus</i> L.               | Polygonaceae  | Yes |  | It can contain high levels of oxalic acid, the quantity of which can be reduced by cooking. |
|                            |                               |                                                                                                                                                                                                                                                                                                                                                                            |   | <i>Rumex pulcher</i> L.               |               | Yes |  |                                                                                             |
| <b>Rose salvatiche</b>     |                               |                                                                                                                                                                                                                                                                                                                                                                            |   | <i>Rosa agrestis</i> Savi             | Rosaceae      | Yes |  |                                                                                             |

|                                  |                               |                                                                                                                                                                                                               |   |                                                          |               |     |  |   |                                                                                                                                                                                                                                                               |
|----------------------------------|-------------------------------|---------------------------------------------------------------------------------------------------------------------------------------------------------------------------------------------------------------|---|----------------------------------------------------------|---------------|-----|--|---|---------------------------------------------------------------------------------------------------------------------------------------------------------------------------------------------------------------------------------------------------------------|
|                                  | Tips or tops and tender twigs | Tips, tops or tender twigs must be cooked before adding them to bread dough                                                                                                                                   |   | <i>Rosa arvensis</i> Huds.                               |               | Yes |  |   |                                                                                                                                                                                                                                                               |
|                                  |                               |                                                                                                                                                                                                               |   | <i>Rosa canina</i> L.                                    |               | Yes |  |   | If ingested, the layer of hairs around the seeds just beneath the flesh of the fruit can cause irritation to the mouth and digestive tract                                                                                                                    |
|                                  |                               |                                                                                                                                                                                                               |   | <i>Rosa gallica</i> L.                                   |               | Yes |  |   |                                                                                                                                                                                                                                                               |
|                                  |                               |                                                                                                                                                                                                               |   | <i>Rosa sempervirens</i> L.                              |               | Yes |  |   |                                                                                                                                                                                                                                                               |
|                                  |                               |                                                                                                                                                                                                               |   | <i>Rosa spinosissima</i> L.                              |               | No  |  |   |                                                                                                                                                                                                                                                               |
| <b>Rosoni</b>                    | Roots                         | The roots, boiled a first time with a small bag of ashes and a second time with pure water, are sieved and added to the bread dough                                                                           |   | <i>Alcea rosea</i> L.                                    | Malvaceae     | Yes |  |   |                                                                                                                                                                                                                                                               |
| <b>Rovi</b>                      | Tips or tops and tender twigs | Tips, tops or tender twigs must be cooked before adding them to bread dough                                                                                                                                   |   | <i>Rubus ulmifolius</i> L.                               | Rosaceae      | Yes |  |   |                                                                                                                                                                                                                                                               |
| <b>Roviglie</b>                  | Seeds<br>Leaves and tops      | The seeds are boiled to make a mush to be mixed with the bread dough<br>Raw leaves and tops are crushed and added to bread dough                                                                              |   | <i>Lathyrus sylvestris</i> L.                            | Fabaceae      | Yes |  | T | All parts of the plant, but especially the seed, contain a toxic amino-acid which can cause 'lathyrism' (a disease of the nervous system) if ingested in large quantities. The amino-acid is produced at about the same time that the seed starts to develop. |
| <b>Ruchetta</b>                  | Leaves<br>Roots               | Leaves are useful against scurvy                                                                                                                                                                              |   | <i>Diplotaxis muralis</i> (L.) DC.                       | Brassicaceae  | Yes |  |   |                                                                                                                                                                                                                                                               |
|                                  |                               |                                                                                                                                                                                                               |   | <i>Eruca vesicaria</i> (L.) Cav.                         |               | Yes |  |   |                                                                                                                                                                                                                                                               |
| <b>Rusco detto Pungitopo</b>     | Young sprouts                 | Cooked young sprouts can be added to bread, but it would be better to eat them alone                                                                                                                          |   | <i>Ruscus aculeatus</i> L.                               | Asparagaceae  | Yes |  |   |                                                                                                                                                                                                                                                               |
| <b>Saggina</b>                   | Seeds                         | Dried seeds are ground into bread flour                                                                                                                                                                       | C | <i>Sorghum bicolor</i> (L.) Moench subsp. <i>bicolor</i> | Poaceae       | No  |  | T |                                                                                                                                                                                                                                                               |
| <b>Salicornia detta Salsuola</b> | Leaves and tops               | Finely crushed and sifted, are used instead of salt to flavour bread doughs                                                                                                                                   |   | <i>Salicornia fruticosa</i> (L.) L.                      | Amaranthaceae | Yes |  |   |                                                                                                                                                                                                                                                               |
|                                  |                               |                                                                                                                                                                                                               |   | <i>Salicornia perennans</i> Willd.                       |               | Yes |  |   |                                                                                                                                                                                                                                                               |
| <b>Salvia</b>                    | Leaves<br>Leaves and tops     | The leaves can be used to modify the bitter and sour taste of some acorns<br>Dried and pulverized leaves and tops, can be added to bread dough to improve the flavour of bland, cloying or flatulent mixtures |   | <i>Salvia officinalis</i> L.                             | Lamiaceae     | Yes |  |   | It can be toxic when used in excess or when taken for extended periods.                                                                                                                                                                                       |
| <b>Sambuco</b>                   | Flowers                       | Dried and pulverized flowers, can be added to bread dough to improve the flavour of bland, cloying or flatulent mixtures                                                                                      |   | <i>Sambucus nigra</i> L.                                 | Adoxaceae     | Yes |  | T |                                                                                                                                                                                                                                                               |
| <b>Sassefrica</b>                | Leaves and tops               | Raw leaves and tops are crushed and added to bread dough                                                                                                                                                      |   | <i>Tragopogon pratensis</i> L.                           | Asteraceae    | Yes |  |   |                                                                                                                                                                                                                                                               |
|                                  |                               |                                                                                                                                                                                                               |   | <i>Satureja hortensis</i> L.                             | Lamiaceae     | Yes |  |   |                                                                                                                                                                                                                                                               |

|                                           |                               |                                                                                                                                                                                                                                                                                      |   |                                                                     |              |     |   |   |                                                                                                                                 |
|-------------------------------------------|-------------------------------|--------------------------------------------------------------------------------------------------------------------------------------------------------------------------------------------------------------------------------------------------------------------------------------|---|---------------------------------------------------------------------|--------------|-----|---|---|---------------------------------------------------------------------------------------------------------------------------------|
| <b><i>Satureia detta Santoreggia</i></b>  | Leaves and tops               | Boil Leaves and tops with legumes, or use their decoction to knead bread that contains legume flour, to avoid mixtures that may cause flatulence<br>Dried and pulverized leaves and tops, can be added to bread dough to improve the flavour of bland, cloying or flatulent mixtures |   | <i>Satureja montana</i> L.                                          |              | Yes |   |   |                                                                                                                                 |
| <b><i>Scabiosa</i></b>                    | Tips or tops and tender twigs | Tips, tops or tender twigs must be cooked before adding them to bread dough                                                                                                                                                                                                          |   | <i>Stachys arvensis</i> (L.) L.                                     |              | No  |   |   |                                                                                                                                 |
| <b><i>Sclarea detta Scarleggia</i></b>    | Leaves and tops               | Dried and pulverized leaves and tops, can be added to bread dough to improve the flavour of bland, cloying or flatulent mixtures                                                                                                                                                     |   | <i>Salvia sclarea</i> L.                                            |              | Yes |   |   |                                                                                                                                 |
| <b><i>Scolimo</i></b>                     | Young sprouts                 | Cooked young sprouts can be added to bread, but it would be better to eat them alone                                                                                                                                                                                                 |   | <i>Cynara cardunculus</i> subsp. <i>scolymus</i> (L.) Hegi          |              | Yes |   |   |                                                                                                                                 |
| <b><i>Scorzonere, Scorzonera</i></b>      | Roots                         | Roots, dried in pieces, can be crushed and mixed to bread dough. Alternatively, fresh pieces can be cooked, sieved and then added to bread dough                                                                                                                                     |   | <i>Pseudopodospermum hispanicum</i> (L.) Zaika, Sukhor. & N. Kilian | Asteraceae   | Yes |   |   |                                                                                                                                 |
|                                           | Leaves and tops               | Raw leaves and tops are crushed and added to bread dough                                                                                                                                                                                                                             |   | <i>Scorzonera humilis</i> L.                                        |              | No  |   |   |                                                                                                                                 |
| <b><i>Sedi o Semprevivi</i></b>           | Leaves and tops               | Raw leaves and tops are crushed and added to bread dough                                                                                                                                                                                                                             |   | <i>Sedum album</i> L.                                               | Crassulaceae | Yes |   | T |                                                                                                                                 |
|                                           |                               |                                                                                                                                                                                                                                                                                      |   | <i>Sedum cepaea</i> L.                                              |              | Yes |   |   |                                                                                                                                 |
|                                           |                               |                                                                                                                                                                                                                                                                                      |   | <i>Sempervivum tectorum</i> L.                                      |              | Yes |   |   |                                                                                                                                 |
| <b><i>Segale</i></b>                      | Seeds                         | Dried seeds are ground into bread flour                                                                                                                                                                                                                                              | C | <i>Secale cereale</i> L.                                            | Poaceae      | No  |   |   |                                                                                                                                 |
| <b><i>Senapa domestica</i></b>            | Leaves                        | Leaves are useful against scurvy                                                                                                                                                                                                                                                     | C | <i>Brassica nigra</i> (L.) W.D.J. Koch                              | Brassicaceae | Yes |   |   | Mustard allergy possibly especially in children and adolescents. Retention of seeds possibly in intestines if taken internally. |
|                                           |                               |                                                                                                                                                                                                                                                                                      |   | <i>Sinapis alba</i> L.                                              |              | Yes |   |   | It is possibly poisonous once the seedpods have formed.                                                                         |
|                                           |                               |                                                                                                                                                                                                                                                                                      |   | <i>Sinapis arvensis</i> L.                                          |              | Yes |   |   |                                                                                                                                 |
| <b><i>Senapa salvatica</i></b>            | Leaves                        | Leaves are useful against scurvy                                                                                                                                                                                                                                                     |   | <i>Sisymbrium irio</i> L.                                           |              | Yes |   |   |                                                                                                                                 |
|                                           |                               |                                                                                                                                                                                                                                                                                      |   | <i>Sisymbrium officinale</i> (L.) Scop.                             |              | Yes |   |   |                                                                                                                                 |
| <b><i>Senecione o Erba Calderugia</i></b> | Leaves and tops               | Raw leaves and tops are crushed and added to bread dough                                                                                                                                                                                                                             |   | <i>Senecio vulgaris</i> L.                                          | Asteraceae   | Yes | T | T | Presence of a liver-affecting toxin.                                                                                            |
| <b><i>Sermollino Cedrato</i></b>          | Leaves and tops               | Dried and pulverized leaves and tops, can be added to bread dough to improve the flavour of bland, cloying or flatulent mixtures                                                                                                                                                     |   | <i>Thymus longicaulis</i> C.Presl.                                  | Lamiaceae    | Yes |   |   |                                                                                                                                 |
|                                           |                               |                                                                                                                                                                                                                                                                                      |   | <i>Thymus praecox</i> Opiz                                          |              | Yes |   |   |                                                                                                                                 |
|                                           |                               |                                                                                                                                                                                                                                                                                      |   | <i>Thymus pulegioides</i> L.                                        |              | Yes |   |   |                                                                                                                                 |

|                                                        |                               |                                                                                                                                                                                                                             |   |                                                                         |               |     |   |   |                                                                                                                                                                                                                                                                                       |
|--------------------------------------------------------|-------------------------------|-----------------------------------------------------------------------------------------------------------------------------------------------------------------------------------------------------------------------------|---|-------------------------------------------------------------------------|---------------|-----|---|---|---------------------------------------------------------------------------------------------------------------------------------------------------------------------------------------------------------------------------------------------------------------------------------------|
| <b>Serpillo detto Sermollino</b>                       | Leaves and tops               | Dried and pulverized leaves and tops, can be added to bread dough to improve the flavour of bland, cloying or flatulent mixtures                                                                                            |   | <i>Thymus vulgaris</i> L.                                               |               | Yes |   |   | Avoid if inflammatory disease of the gastrointestinal tract. Internal use contraindicated especially in pregnancy. Caution if sensitive to grasses                                                                                                                                    |
| <b>Sinfito o Consolida maggiore</b>                    | Roots<br>Leaves and tops      | The roots, boiled and sieved can be added to the bread dough<br>Raw leaves and tops are crushed and added to bread dough                                                                                                    |   | <i>Symphytum officinale</i> L.                                          | Boraginaceae  | Yes | T |   | Presence of a liver-affecting toxic alkaloid in the roots (large quantities) and leaves (higher as they grow older, almost none in young leaves).                                                                                                                                     |
| <b>Sinfito di radica tuberosa</b>                      | Roots                         | The roots, boiled and sieved can be added to the bread dough                                                                                                                                                                |   | <i>Symphytum tuberosum</i> subsp. <i>angustifolium</i> (A. Kern.) Nyman |               | Yes | T |   | Possible presence of a liver-affecting toxic alkaloid.                                                                                                                                                                                                                                |
| <b>Sio Montano</b>                                     | Leaves and Seeds              | Dried and pulverized leaves and seeds, can be added to bread dough to improve the flavour of bland, cloying or flatulent mixtures                                                                                           |   | <i>Sium latifolium</i> L.                                               | Apiaceae      | No  |   |   | The entire plant, and especially the root, is poisonous                                                                                                                                                                                                                               |
| <b>Sio Palustre detto Crescione</b>                    | Leaves and Seeds              | Dried and pulverized leaves and seeds, can be added to bread dough to improve the flavour of bland, cloying or flatulent mixtures                                                                                           |   | <i>Helosciadium nodiflorum</i> (L.) W.D.J. Koch                         |               | Yes |   |   |                                                                                                                                                                                                                                                                                       |
| <b>Sisimbrio Aquatico</b>                              | Leaves                        | Leaves are useful against scurvy                                                                                                                                                                                            |   | <i>Nasturtium officinale</i> W.T. Aiton                                 | Brassicaceae  | Yes |   |   | Risk of it being infested with the liver fluke parasite; cooking the leaves will destroy any parasites. May inhibit the metabolism of paracetamol.                                                                                                                                    |
| <b>Solidaggine Sarracenica</b>                         | Tips or tops and tender twigs | Tips, tops or tender twigs must be cooked before adding them to bread dough                                                                                                                                                 |   | <i>Senecio ovatus</i> (G. Gaertn., B. Mey. & Scherb.) Willd.            | Asteraceae    | No  | T | T |                                                                                                                                                                                                                                                                                       |
| <b>Sorbo aucupario detto Sorbezzolo*</b>               | Fruits                        | Sour fruits, fresh or dried, are cooked in water, sieved and then added to bread dough                                                                                                                                      |   | <i>Sorbus aucuparia</i> L.                                              | Rosaceae      | Yes |   |   | Large quantities of the raw fruit can cause vomiting.                                                                                                                                                                                                                                 |
| <b>Sorbo Torminale</b>                                 | Fruits                        | Sour fruits, fresh or dried, are cooked in water, sieved and then added to bread dough                                                                                                                                      |   | <i>Sorbus torminalis</i> (L.) Crantz                                    |               | Yes |   |   |                                                                                                                                                                                                                                                                                       |
| <b>Sparagi salvatichi</b><br><b>Sparagio Salvatico</b> | Roots,<br>Young sprouts       | The roots, boiled a first time with a small bag of ashes and a second time with pure water, are sieved and added to the bread dough<br>Cooked young sprouts can be added to bread, but it would be better to eat them alone |   | <i>Asparagus acutifolius</i> L.                                         | Asparagaceae  | Yes |   |   |                                                                                                                                                                                                                                                                                       |
| <b>Spinaci</b>                                         | Leaves                        |                                                                                                                                                                                                                             | C | <i>Spinacia oleracea</i> L.                                             |               | No  |   |   | Leaves contain oxalic acid, the quantity of which can be reduced by cooking.                                                                                                                                                                                                          |
| <b>Spinacione Spinacioni</b>                           | Leaves and tops               | Raw leaves and tops are crushed and added to bread dough                                                                                                                                                                    | C | <i>Atriplex hortensis</i> L.                                            | Amaranthaceae | Yes |   |   | Leaves can concentrate harmful amounts of nitrates if the plant grows on nitrogen-rich soils<br><br>The seed contains <i>saponins</i> that can be removed by carefully leaching the seed or flour in running water or thorough cooking (and perhaps changing the cooking water once). |

|                                                         |                                        |                                                                                                                                                                                                                                                                                             |   |                                                |                |     |   |   |                                                                                         |
|---------------------------------------------------------|----------------------------------------|---------------------------------------------------------------------------------------------------------------------------------------------------------------------------------------------------------------------------------------------------------------------------------------------|---|------------------------------------------------|----------------|-----|---|---|-----------------------------------------------------------------------------------------|
| <b><i>Sughero</i></b>                                   | Seeds                                  | Dried seeds are ground in order to obtain flour. Before using it, acorn flour must be boiled until it becomes a liquid paste, then it is added to bread dough                                                                                                                               |   | <i>Quercus suber</i> L.                        | Fagaceae       | Yes |   |   |                                                                                         |
| <b><i>Susine domestiche</i></b>                         | Fruits                                 | Fruits, dried in segments, can be crushed and mixed to bread dough; alternatively fresh or dried segments can be cooked first and then added to bread dough                                                                                                                                 | C | <i>Prunus domestica</i> L.                     | Rosaceae       | Yes |   |   |                                                                                         |
| <b><i>Susine salvatiche o prugnone o di macchia</i></b> | Fruits                                 | Sour fruits, fresh or dried, are cooked in water, sieved and then added to bread dough                                                                                                                                                                                                      |   | <i>Prunus spinosa</i> L. subsp. <i>spinosa</i> |                | Yes |   |   |                                                                                         |
| <b><i>Tamerigia</i></b>                                 | Tips or tops and tender twigs          | Tips, tops or tender twigs must be cooked before adding them to bread dough                                                                                                                                                                                                                 |   | <i>Tamarix gallica</i> L.                      | Tamaricaceae   | No  |   |   |                                                                                         |
| <b><i>Terracrepolo</i></b>                              | Leaves and tops                        | Raw leaves and tops are crushed and added to bread dough                                                                                                                                                                                                                                    |   | <i>Reichardia picroides</i> (L.) Roth          | Asteraceae     | Yes |   |   |                                                                                         |
| <b><i>Tino detto Lentaggine</i></b>                     | Tips or tops and tender twigs          | Tips, tops or tender twigs must be cooked before adding them to bread dough                                                                                                                                                                                                                 |   | <i>Viburnum tinus</i> L.                       | Adoxaceae      | No  |   | T |                                                                                         |
| <b><i>Tormentilla</i></b>                               | Roots<br>Tips or tops and tender twigs | The dried roots are crushed and sieved and the resulting powder is boiled, then decanted and the water is thrown away to add new water and boiled a second time, then the powder is added to the bread dough<br>Tips, tops or tender twigs must be cooked before adding them to bread dough |   | <i>Potentilla erecta</i> (L.) Raesch.          | Rosaceae       | No  |   |   | Gastrointestinal symptoms if doses over 1g.                                             |
| <b><i>Tosillaggine o Farfero</i></b>                    | Roots<br>Leaves                        | The roots, boiled to one water and sieved can be added to the bread dough<br>Leaves are boiled, if necessary twice with water change, then pounded, sieved and added to bread dough                                                                                                         |   | <i>Tussilago farfara</i> L.                    | Asteraceae     | Yes | T |   | It contains liver-affecting pyrrolizidine alkaloids (potentially toxic in large doses). |
| <b><i>Tribolo acquatico</i></b>                         | Seeds                                  | Dried seeds are ground in order to obtain flour to be mixed with bread dough                                                                                                                                                                                                                |   | <i>Trapa natans</i> L.                         | Lythraceae     | Yes |   |   | Raw seeds contain toxins that are destroyed by cooking.                                 |
| <b><i>Trifoglio Acetosella</i></b>                      | Leaves                                 | The leaves can be used to give a pretty sour flavour to unflavoured or too sweet bread doughs; they are useful against scurvy                                                                                                                                                               |   | <i>Oxalis acetosella</i> L.                    | Oxalidaceae    | Yes | T |   | Leaves contain oxalic acid, the quantity of which can be reduced by cooking.            |
| <b><i>Tulipano giallo salvatico</i></b>                 | Roots                                  | The roots, boiled a first time with a small bag of ashes and a second time with pure water, are sieved and added to the bread dough                                                                                                                                                         |   | <i>Tulipa sylvestris</i> L.                    | Liliaceae      | Yes |   | T | Bulbs and flowers can cause dermatitis in sensitive people                              |
| <b><i>Valeriana rossa o pisana</i></b>                  | Leaves and tops                        | Raw leaves and tops are crushed and added to bread dough                                                                                                                                                                                                                                    |   | <i>Centranthus ruber</i> (L.) DC.              | Caprifoliaceae | Yes |   |   |                                                                                         |
| <b><i>Vecce</i></b>                                     | Seeds                                  | The seed is dried and ground into flour                                                                                                                                                                                                                                                     |   | <i>Lathyrus hirsutus</i> L.                    | Fabaceae       | No  |   |   |                                                                                         |

|                         |                                               |                                                                                                                                                                                                                                                                                                                                                                          |   |                                                                          |                |     |   |                                                                                                                                                                                                                                                                                 |
|-------------------------|-----------------------------------------------|--------------------------------------------------------------------------------------------------------------------------------------------------------------------------------------------------------------------------------------------------------------------------------------------------------------------------------------------------------------------------|---|--------------------------------------------------------------------------|----------------|-----|---|---------------------------------------------------------------------------------------------------------------------------------------------------------------------------------------------------------------------------------------------------------------------------------|
|                         |                                               |                                                                                                                                                                                                                                                                                                                                                                          |   | <i>Lathyrus pratensis</i> L.                                             |                | Yes |   | The seed might be poisonous in large quantities                                                                                                                                                                                                                                 |
|                         |                                               |                                                                                                                                                                                                                                                                                                                                                                          |   | <i>Vicia lathyroides</i> L.                                              |                | No  |   |                                                                                                                                                                                                                                                                                 |
|                         |                                               |                                                                                                                                                                                                                                                                                                                                                                          |   | <i>Vicia monantha</i> Retz. subsp. <i>calcarata</i> (Desf.) Romero Zarco |                | No  |   |                                                                                                                                                                                                                                                                                 |
| <i>Vecce domestiche</i> | Tips or tops and tender twigs                 | Tips, tops or tender twigs must be cooked before adding them to bread dough                                                                                                                                                                                                                                                                                              | C | <i>Vicia sativa</i> L.                                                   |                | Yes |   | The seed might be poisonous in large quantities                                                                                                                                                                                                                                 |
| <i>Vecce Salvatiche</i> | Seeds                                         | The seeds are boiled to make a mush to be mixed with the bread dough<br>Tips, tops or tender twigs must be cooked before adding them to bread dough                                                                                                                                                                                                                      |   | <i>Vicia lutea</i> L.                                                    |                | No  |   |                                                                                                                                                                                                                                                                                 |
|                         | Tips or tops and tender twigs                 |                                                                                                                                                                                                                                                                                                                                                                          |   | <i>Vicia sepium</i> L.                                                   |                | No  |   |                                                                                                                                                                                                                                                                                 |
| <i>Veggioli</i>         | Seeds                                         | The seeds are boiled to make a mush to be mixed with the bread dough                                                                                                                                                                                                                                                                                                     |   | <i>Ervilia sativa</i> Link                                               |                | Yes |   | The seed might be poisonous in large quantities                                                                                                                                                                                                                                 |
| <i>Vena</i>             | Seeds                                         | Dried seeds are ground into bread flour                                                                                                                                                                                                                                                                                                                                  | C | <i>Avena sativa</i> L.                                                   | Poaceae        | No  |   |                                                                                                                                                                                                                                                                                 |
| <i>Verbena</i>          | Tips or tops and tender twigs                 | Tips, tops or tender twigs must be cooked before adding them to bread dough                                                                                                                                                                                                                                                                                              |   | <i>Verbena officinalis</i> L.                                            | Verbenaceae    | Yes | T | Verbenalin: can cause nervous system paralysis resulting in stupor and convulsion. Allopathic medicine for high blood pressure can be effected by vervain. Uterus stimulation possible – avoid during pregnancy. Avoid if breast feeding. If allergies or fits use with caution |
| <i>Veronica maschia</i> | Tips or tops and tender twigs                 | Tips, tops or tender twigs must be cooked before adding them to bread dough                                                                                                                                                                                                                                                                                              |   | <i>Veronica chamaedrys</i> L.                                            | Plantaginaceae | Yes |   |                                                                                                                                                                                                                                                                                 |
|                         |                                               |                                                                                                                                                                                                                                                                                                                                                                          |   | <i>Veronica officinalis</i> L.                                           |                | No  |   |                                                                                                                                                                                                                                                                                 |
| <i>Viole mammore</i>    | Leaves                                        | Leaves are boiled, if necessary twice with water change, then pounded, sieved and added to bread dough                                                                                                                                                                                                                                                                   |   | <i>Viola odorata</i> L.                                                  | Violaceae      | Yes |   | May be cause vomiting; possible additive effect with laxatives                                                                                                                                                                                                                  |
| <i>Virga Aurea</i>      | Tips or tops and tender twigs                 | Tips, tops or tender twigs must be cooked before adding them to bread dough                                                                                                                                                                                                                                                                                              |   | <i>Solidago virgaurea</i> L.                                             | Asteraceae     | No  |   | Mild allergic reactions. Avoid during pregnancy and breast feeding. Care if chronic kidney disease.                                                                                                                                                                             |
| <i>Vite domestica</i>   | Fruits<br>Tender shoots and vines<br>Tendrils | Small fruits, dried, can be added directly to bread dough; dried and crushed pomace can be added to flour with a bitter taste<br>Cooked tender shoots and vines can be added to bread, but it would be better to eat them alone<br>The young tendrils can be used to give a pretty sour flavour to unflavoured or too sweet bread doughs; they are useful against scurvy | C | <i>Vitis vinifera</i> L.                                                 | Vitaceae       | Yes |   |                                                                                                                                                                                                                                                                                 |

|                   |                               |                                                                                                                                             |   |                                  |               |    |  |  |  |
|-------------------|-------------------------------|---------------------------------------------------------------------------------------------------------------------------------------------|---|----------------------------------|---------------|----|--|--|--|
| <i>Vulneraria</i> | Tips or tops and tender twigs | Tips, tops or tender twigs must be cooked before adding them to bread dough                                                                 |   | <i>Anthyllis vulneraria</i> L.   | Fabaceae      | No |  |  |  |
| <i>Zucche</i>     | Fruits                        | Boiled fruit pulp is added to bread dough<br>Cooked tender shoots and vines can be added to bread, but it would be better to eat them alone | C | <i>Cucurbita maxima</i> Duchesne | Cucurbitaceae | No |  |  |  |
|                   | Tender shoots and vines       |                                                                                                                                             | C | <i>Cucurbita pepo</i> L.         |               | No |  |  |  |

**Table S2.** List of vernacular names used by Giovanni Targioni Tozzetti [6] for which a match could not be found. Column headings as in Table S1.

| Vernacular name        | PU                            | Procedure                                                                    | Species                                                                  |
|------------------------|-------------------------------|------------------------------------------------------------------------------|--------------------------------------------------------------------------|
| <i>Medicaggine</i>     | Leaves and tops               | Raw leaves and tops are crushed and added to bread dough                     | -                                                                        |
| <i>Cipperoidi</i>      | Seeds                         | Dried seeds are ground in order to obtain flour to be mixed with bread dough | -                                                                        |
| <i>Giunchi</i>         | Seeds                         | Dried seeds are ground in order to obtain flour to be mixed with bread dough | <i>Juncus</i> sp. pl., <i>Scirpus</i> sp. pl., other species             |
|                        | Roots                         | Young roots, fresh or boiled, are crushed and added to bread dough           |                                                                          |
| <i>Latiro</i>          | Seeds                         | The seeds are boiled to make a mush to be mixed with the bread dough         | <i>Lathyrus</i> sp.                                                      |
| <i>Rose domestiche</i> | Tips or tops and tender twigs | Tips, tops or tender twigs must be cooked before adding them to bread dough  | <i>Rosa</i> sp. pl.                                                      |
| <i>Salci</i>           | Tips or tops and tender twigs | Tips, tops or tender twigs must be cooked before adding them to bread dough  | <i>Salix</i> sp. pl.                                                     |
| <i>Trifoglio</i>       | Leaves and tops               | Raw leaves and tops are crushed and added to bread dough                     | <i>Lotus</i> sp. pl., <i>Dorycnium</i> sp. pl., <i>Trifolium</i> sp. pl. |



**Table S3.** Section A): Taxa in common (37) between list of species from the AlimurgITA database with the one proposed by Giovanni Targioni Tozzetti [6]; Section B): taxa NOT in common (16) between the list of species from the AlimurgITA database with the one proposed by Giovanni Targioni Tozzetti [6].

| Species                                                                         | Use                                  | Used part       |
|---------------------------------------------------------------------------------|--------------------------------------|-----------------|
| <i>Section A</i>                                                                |                                      |                 |
| <i>Artemisia vulgaris</i> L.                                                    | bread flavoring                      | leaves          |
| <i>Arum italicum</i> Mill. subsp. <i>italicum</i>                               | production of flour                  | roots           |
| <i>Asphodelus albus</i> Mill. subsp. <i>subalpinus</i> Nyman                    | production of flour                  | roots           |
| <i>Bistorta officinalis</i> Delarbre                                            | production of flour                  | roots           |
| <i>Castanea sativa</i> Mill.                                                    | production of flour                  | fruits          |
| <i>Chenopodium album</i> L.                                                     | production of flour                  | seeds           |
| <i>Cyclamen hederifolium</i> Aiton                                              | production of flour                  | roots           |
| <i>Cyclamen repandum</i> Sm. subsp. <i>repandum</i>                             | production of flour                  | roots           |
| <i>Elymus repens</i> (L.) Gould subsp. <i>repens</i>                            | production of flour, bread flavoring | roots, fruits   |
| <i>Ervilia sativa</i> Link                                                      | production of flour                  | seeds           |
| <i>Fagopyrum esculentum</i> Moench                                              | production of flour                  | seeds           |
| <i>Ficaria verna</i> Huds.                                                      | production of flour                  | roots           |
| <i>Ficus carica</i> L.                                                          | bread flavoring                      | fruits          |
| <i>Foeniculum vulgare</i> Mill.                                                 | bread flavoring                      | fruits          |
| <i>Galium aparine</i> L.                                                        | production of flour                  | seeds           |
| <i>Humulus lupulus</i> L.                                                       | bread flavoring                      | flowers         |
| <i>Juglans regia</i> L.                                                         | bread flavoring                      | seeds           |
| <i>Lathyrus sylvestris</i> L. subsp. <i>sylvestris</i>                          | production of flour                  | seeds           |
| <i>Linum usitatissimum</i> L.                                                   | production of flour                  | seeds           |
| <i>Lotus tetragonolobus</i> L.                                                  | production of flour                  | seeds           |
| <i>Malva sylvestris</i> L.                                                      | bread flavoring                      | seeds           |
| <i>Medicago sativa</i> L.                                                       | production of flour                  | seeds           |
| <i>Nymphaea alba</i> L.                                                         | production of flour                  | seeds, roots    |
| <i>Origanum vulgare</i> L. (incl. subsp. <i>viridulum</i> (Martrin-Donos) Nyman | bread flavoring                      | leaves, flowers |
| <i>Oryza sativa</i> L. subsp. <i>sativa</i>                                     | production of flour                  | seeds           |
| <i>Panicum miliaceum</i> L.                                                     | production of flour                  | seeds           |

|                                                                          |                     |        |
|--------------------------------------------------------------------------|---------------------|--------|
| <i>Pistacia lentiscus</i> L.                                             | bread flavoring     | seeds  |
| <i>Pyrus communis</i> L.                                                 | bread flavoring     | fruits |
| <i>Quercus ilex</i> L. subsp. <i>ilex</i>                                | production of flour | fruits |
| <i>Quercus pubescens</i> Willd. subsp. <i>pubescens</i>                  | production of flour | fruits |
| <i>Quercus robur</i> L.                                                  | production of flour | fruits |
| <i>Quercus suber</i> L.                                                  | production of flour | fruits |
| <i>Raphanus raphanistrum</i> L.                                          | bread flavoring     | leaves |
| <i>Rosa canina</i> L.                                                    | production of flour | fruits |
| <i>Salvia rosmarinus</i> Spenn.                                          | bread flavoring     | leaves |
| <i>Schoenoplectus lacustris</i> (L.) Palla                               | production of flour | roots  |
| <i>Vicia sativa</i> L.                                                   | production of flour | seeds  |
| <i>Section B</i>                                                         |                     |        |
| <i>Allium subhirsutum</i> L. subsp. <i>subhirsutum</i>                   | bread flavoring     | roots  |
| <i>Bassia scoparia</i> (L.) Voss                                         | production of flour | seeds  |
| <i>Betula pendula</i> Roth                                               | production of flour | barks  |
| <i>Betula pubescens</i> Ehrh.                                            | production of flour | barks  |
| <i>Blitum bonus-henricus</i> (L.) Rehb.                                  | production of flour | seeds  |
| <i>Brachypodium sylvaticum</i> (Huds.) P.Beauv. subsp. <i>sylvaticum</i> | production of flour | roots  |
| <i>Carum carvi</i> L.                                                    | bread flavoring     | fruits |
| <i>Ceratonia siliqua</i> L.                                              | production of flour | seeds  |
| <i>Erythronium dens-canis</i> L.                                         | production of flour | roots  |
| <i>Galium aparine</i> L.                                                 | production of flour | seeds  |
| <i>Lolium pratense</i> (Huds.) Darbysh.                                  | production of flour | seeds  |
| <i>Loncomelos pyrenaicum</i> (L.) L.D.Hrouda                             | bread flavoring     | seeds  |
| <i>Malva parviflora</i> L.                                               | bread flavoring     | seeds  |
| <i>Nigella arvensis</i> L.                                               | bread flavoring     | fruits |
| <i>Sorbus aria</i> (L.) Crantz                                           | production of flour | fruits |
| <i>Thymbra capitata</i> (L.) Cav.                                        | bread flavoring     | leaves |
